# Supplementary material
Source: PubMed Central journal article supplement (PMC2276441)
Supplement: plntcell_tpc.107.056879_1.pdf [file plntcell_tpc.107.056879_1.pdf]

## Supplemental Data

For

**High resolution mapping of epigenetic modifications of the rice genome uncovers  
interplay between DNA methylation, histone methylation and gene expression**

Xueyong Li<sup>1,2\*</sup>, Xiangfeng Wang<sup>1,2,3\*</sup>, Kun He<sup>2,3</sup>, Yeqin Ma<sup>2</sup>, Ning Su<sup>2</sup>, Hang He<sup>1</sup>,  
Viktor Stolc<sup>4</sup>, Waraporn Tongprasit<sup>4</sup>, Weiwei Jin<sup>5</sup>, Jiming Jiang<sup>5</sup>, William Terzaghi<sup>2</sup>,  
Songgang Li<sup>3</sup> and Xing Wang Deng<sup>1,2,3†</sup>

1National Institute of Biological Sciences, Zhongguancun Life Science Park, Beijing 102206, China. 2Department of Molecular, Cellular, and Developmental Biology, Yale University, New Haven, CT 06520, USA. 3Peking-Yale Joint Research Center of Plant Molecular Genetics and Agrobiotechnology, College of Life Sciences, Peking University, Beijing 100871, China. 4Genome Research Facility, NASA Ames Research Center, MS 239-11, Moffett Field, CA 94035, USA. 5Department of Horticulture, University of Wisconsin, Madison, Wisconsin 53706

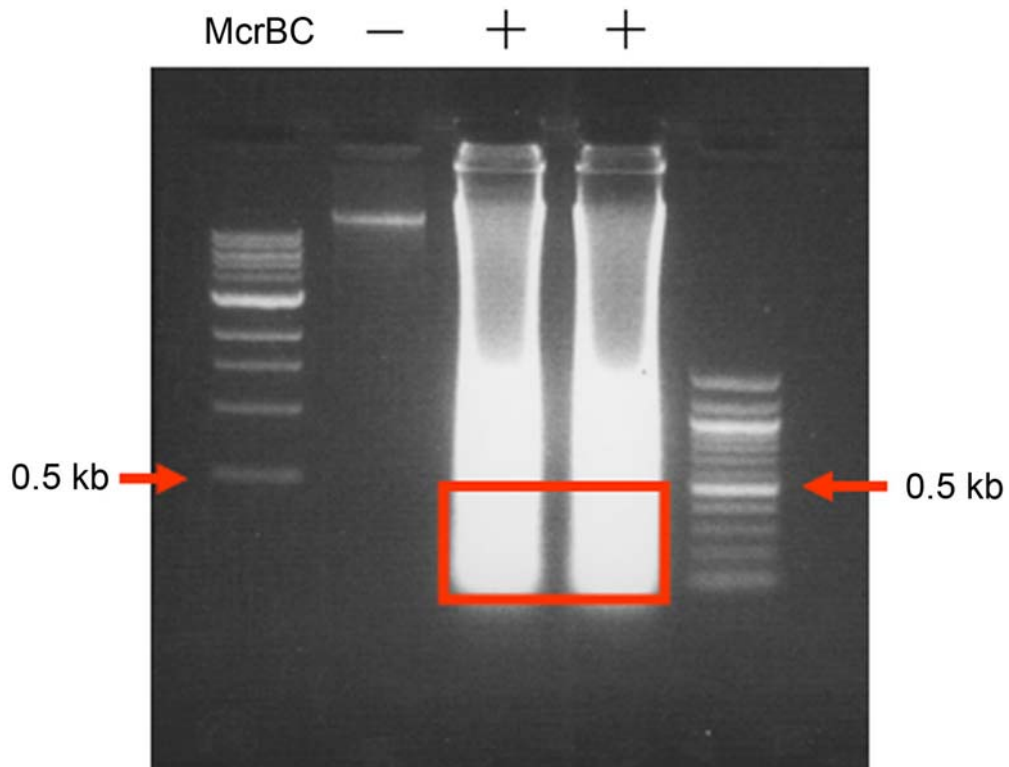

**Supplemental Figure 1. Isolation of methylated DNA by the McrBC digestion method.**

20  $\mu\text{g}$  of genomic DNA were digested overnight with 200 units of McrBC (New England Biolabs), which only digests methylated DNA at [A/G]mC (N40-3000) [A/G]mC. Highly methylated regions were cut into small fragments. McrBC digests were separated on a 1.0% agarose gel. DNA fragments smaller than 0.5 kb, which are mainly composed of methylated DNA, were collected and purified using Qiagen Qiaquick gel extraction kits.

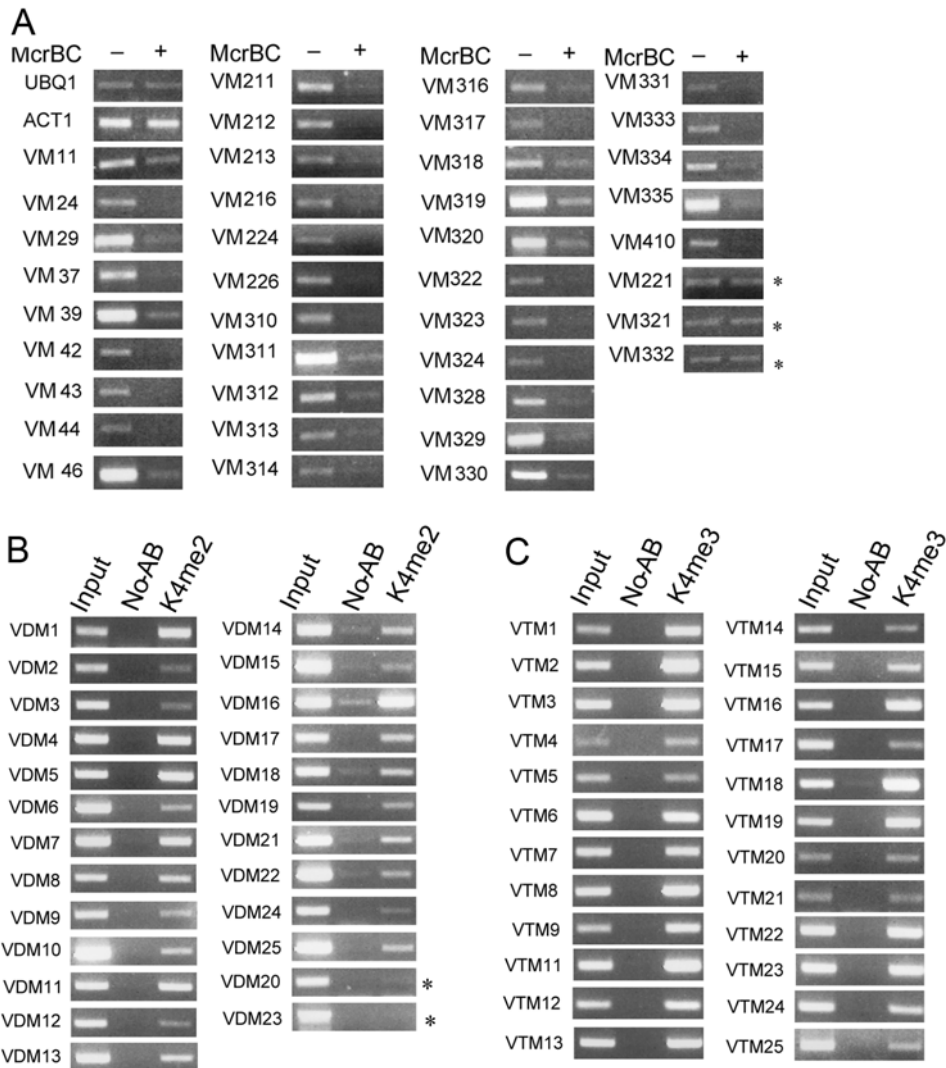

**Supplemental Figure 2. Experimental confirmation of DNA methylation, H3K4me3 and H3K4me2 regions.**

To assess the reliability of the threshold ( $P < 0.05$ ), experimental validations of selected modified regions identified by the Wilcoxon test were performed.

(A) McrBC-PCR validation of DNA methylation. Methylation of the indicated sequences was evaluated by the McrBC-PCR method as described in “methods.” “+” = samples treated with McrBC, “-” = samples treated with heat-inactivated McrBC. “\*” = unvalidated sample.

(B) Confirmation of H3K4me2 regions by ChIP-PCR. Modification of the indicated sequences by H3K4me2 was tested by ChIP-PCR as described in “methods.” “Input” = whole cell extract, No-AB = samples treated for ChIP except antibody was omitted, K4me2 = samples immunoprecipitated with anti-H3K4me2. “\*” = unvalidated sample.

(C) Confirmation of H3K4me3 regions by ChIP-PCR. Modification of the indicated sequences by H3K4me3 was tested by ChIP-PCR as described in “methods.” “Input” = whole cell extract, No-AB = samples treated for ChIP except antibody was omitted, K4me3 = samples immunoprecipitated with anti-H3K4me2.

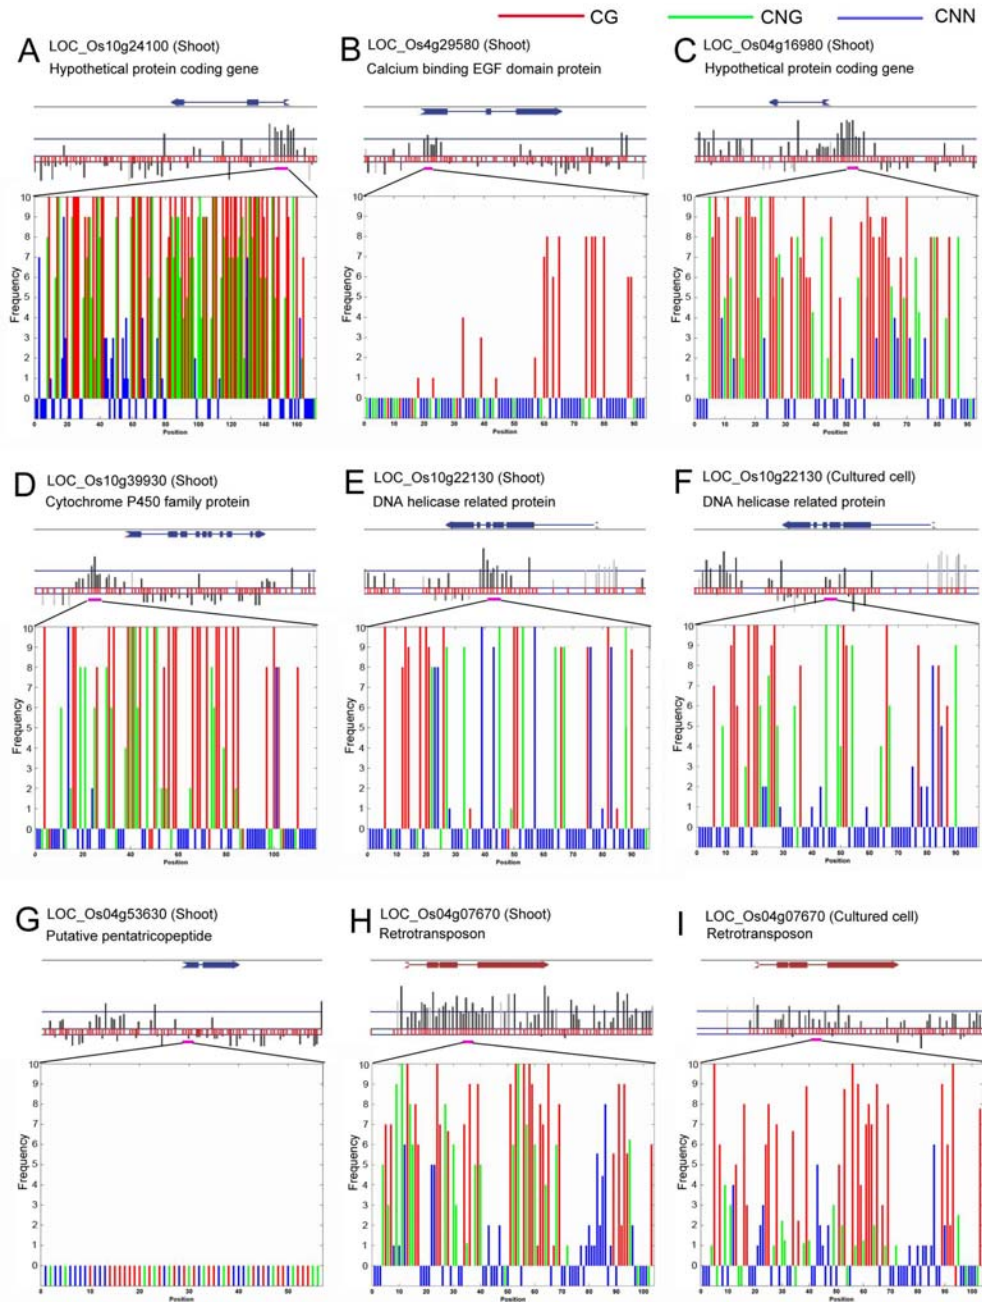

**Supplemental Figure 3. Experimental validation of DNA methylation regions by genomic bisulfite sequencing.**

Methylated cytosines were detected in the indicated genes from the indicated tissues by bisulfite sequencing as described in “methods.” CG, CNG, and CNN = methylcytosines detected in the indicated contexts.

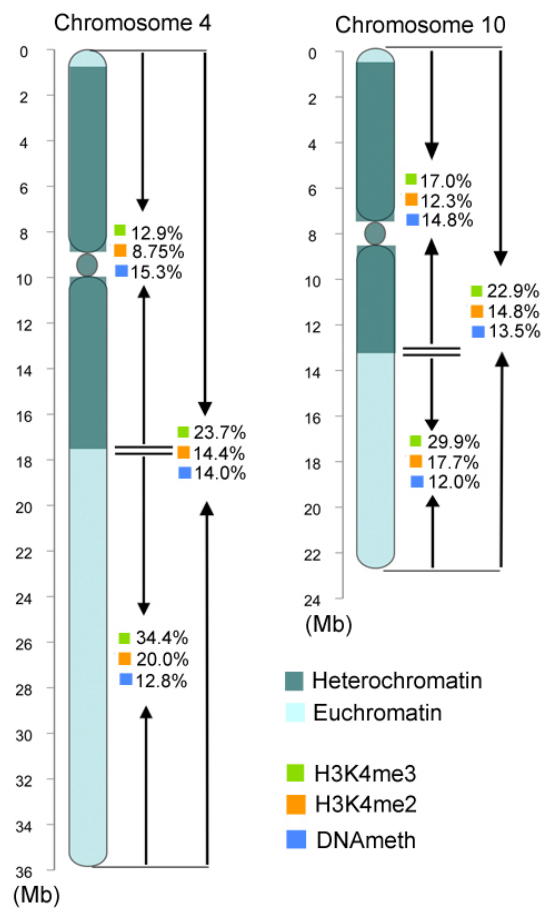

**Supplemental Figure 4. Coverage of rice chromosomes 4 and 10 by three types of epigenetic modifications in suspension-cultured cells.**

Coverage is calculated as the sum of the specified modified regions divided by the length of the indicated region for heterochromatin, euchromatin and the entire chromosome, respectively.

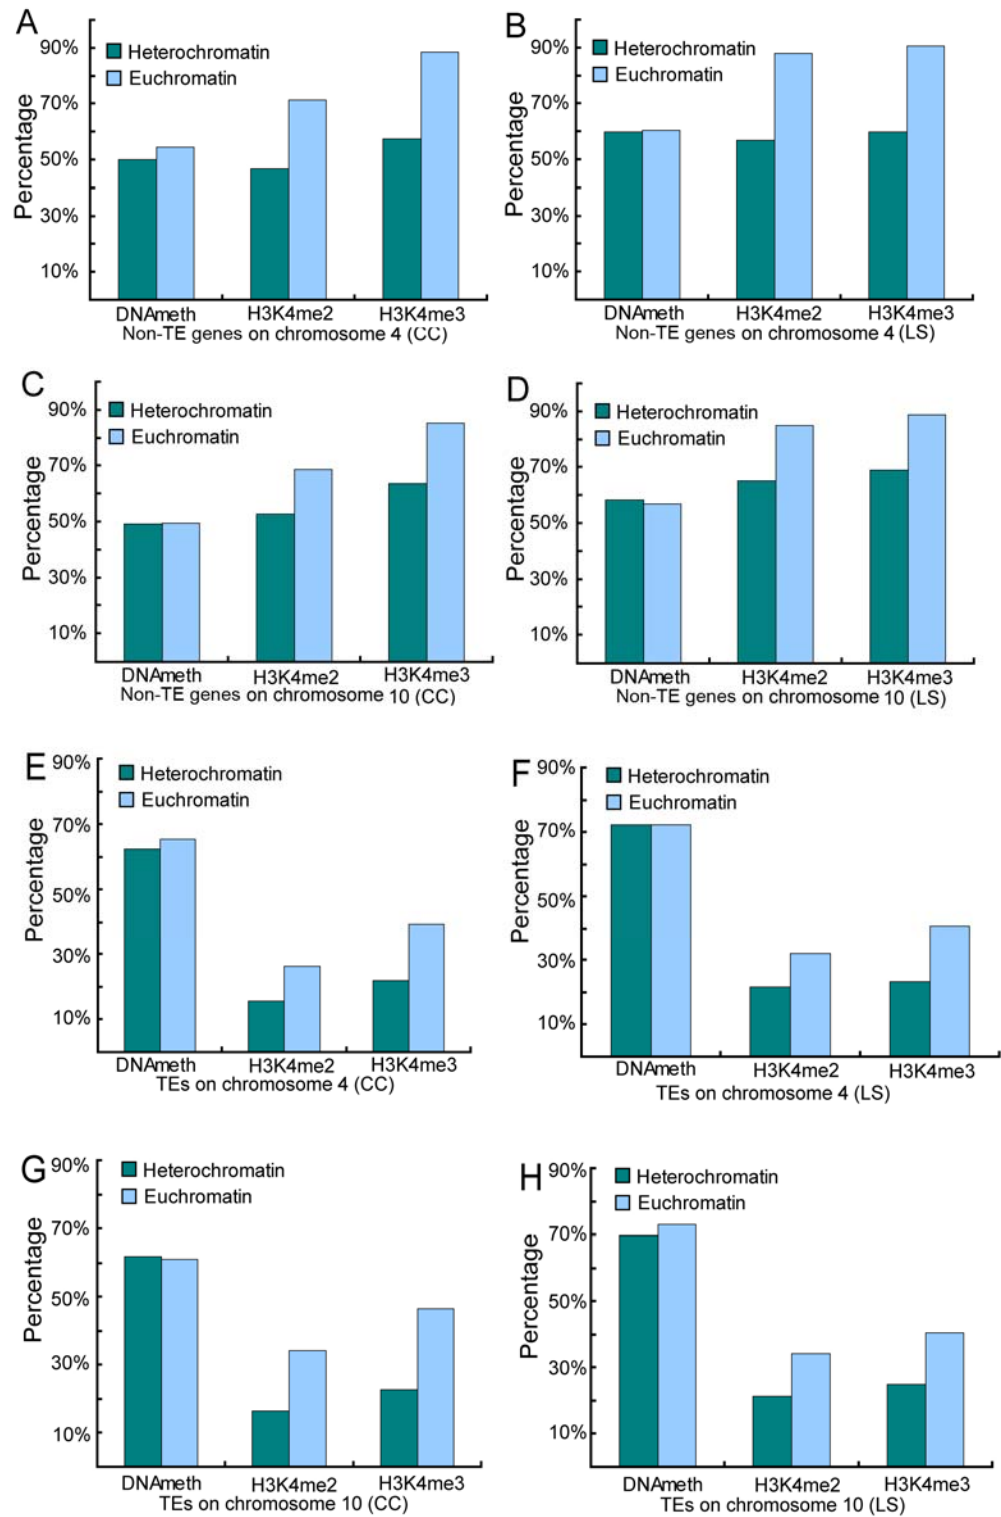

**Supplemental Figure 5. Proportions of epigenetically-modified protein-coding and TE genes in heterochromatin and euchromatin.**

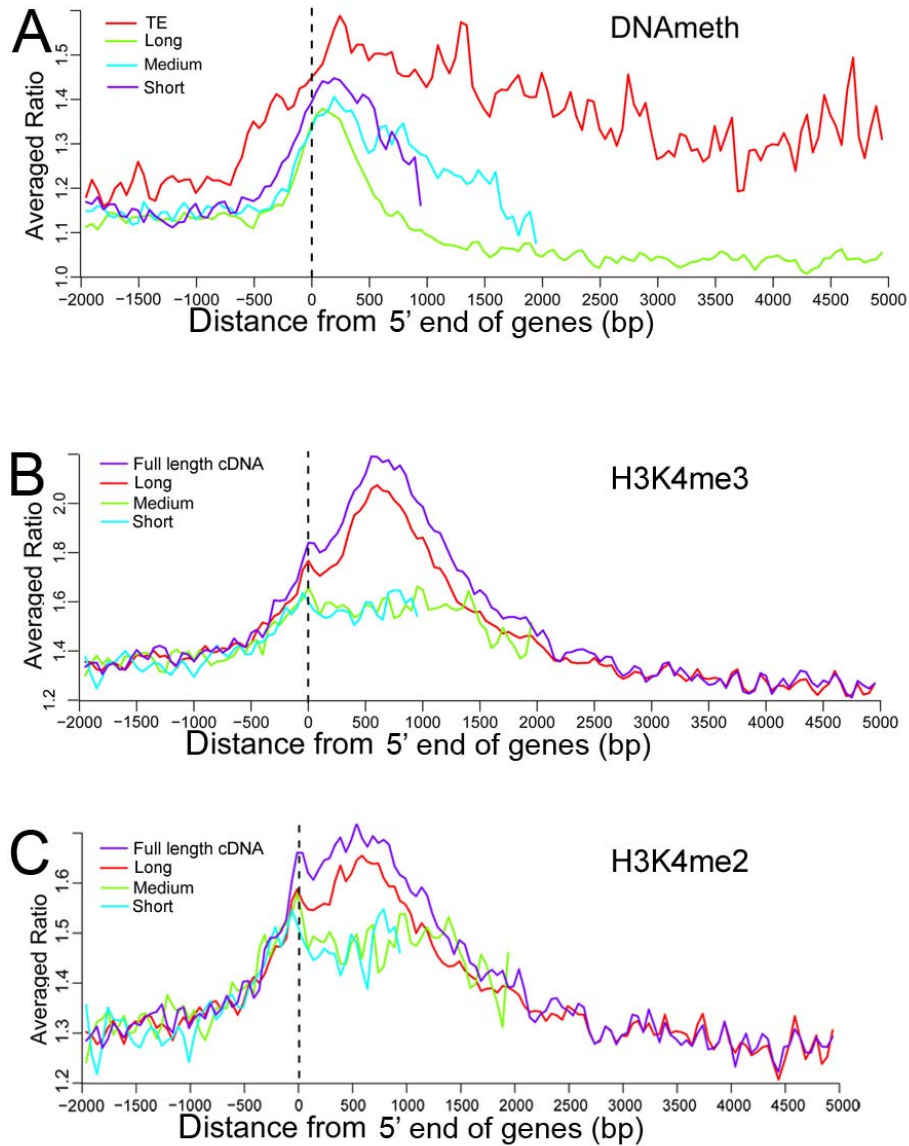

**Supplemental Figure 6. Distribution of H3K4me3, H3K4me2 and DNA methylation within aligned genes in light-grown rice shoots.**

(A) Distribution of H3K4me3 along aligned long, medium and short rice genes. Full length cDNAs were used as reference.

(B) Distribution of H3K4me2 along aligned long, medium and short rice genes. Full length cDNAs were used as reference.

(C) Distribution of DNA methylation along aligned long, medium and short rice genes. TEs were used as reference.

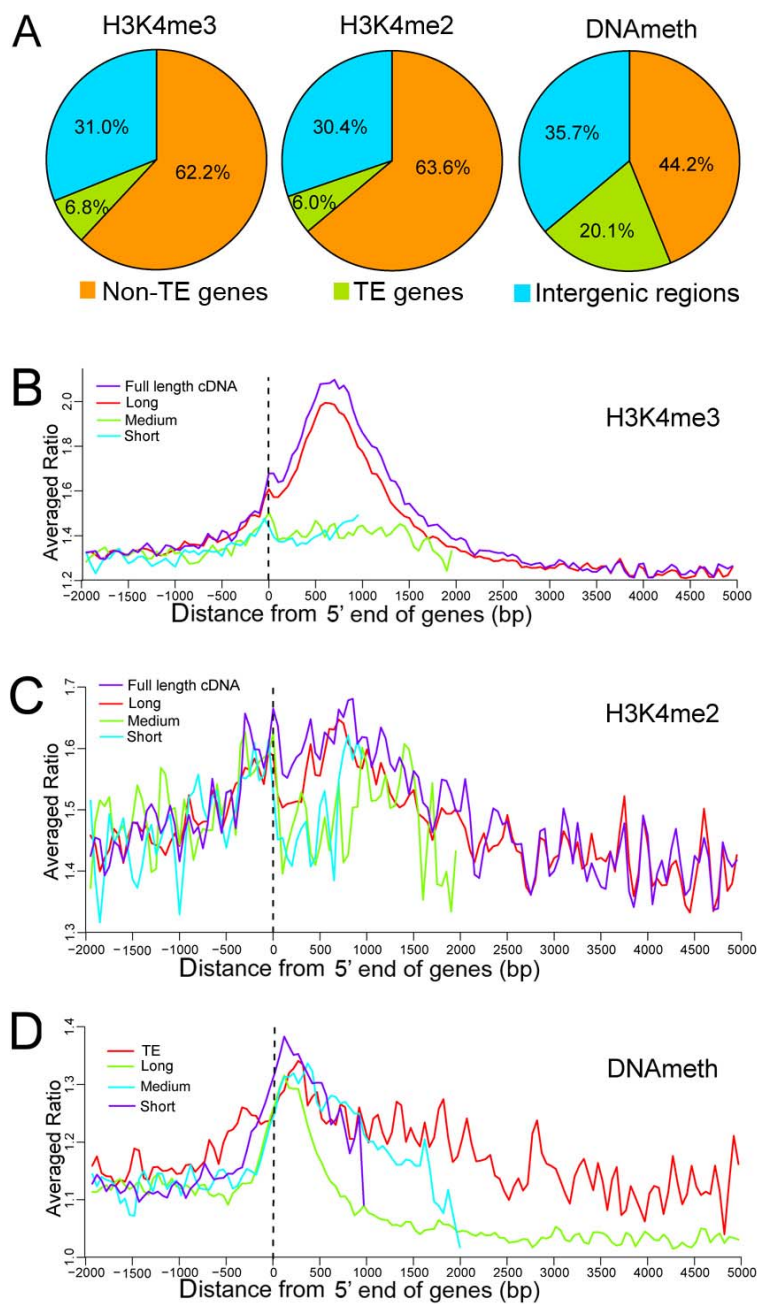

**Supplemental Figure 7. Distributions of H3K4me3, H3K4me2 and DNA methylation within aligned genes in cultured rice cells.**

(A) Frequencies of H3K4me3, H3K4me2 and DNA methylation occurring on gene, TE and intergenic regions.

(B) Distribution of H3K4me3 along aligned long, medium and short rice genes. Full length cDNAs were used as reference.

(C) Distribution of H3K4me2 along aligned long, medium and short rice genes. Full length cDNA were used as reference.

(D) Distribution of DNA methylation along aligned long, medium and short rice genes. TEs were used as reference.



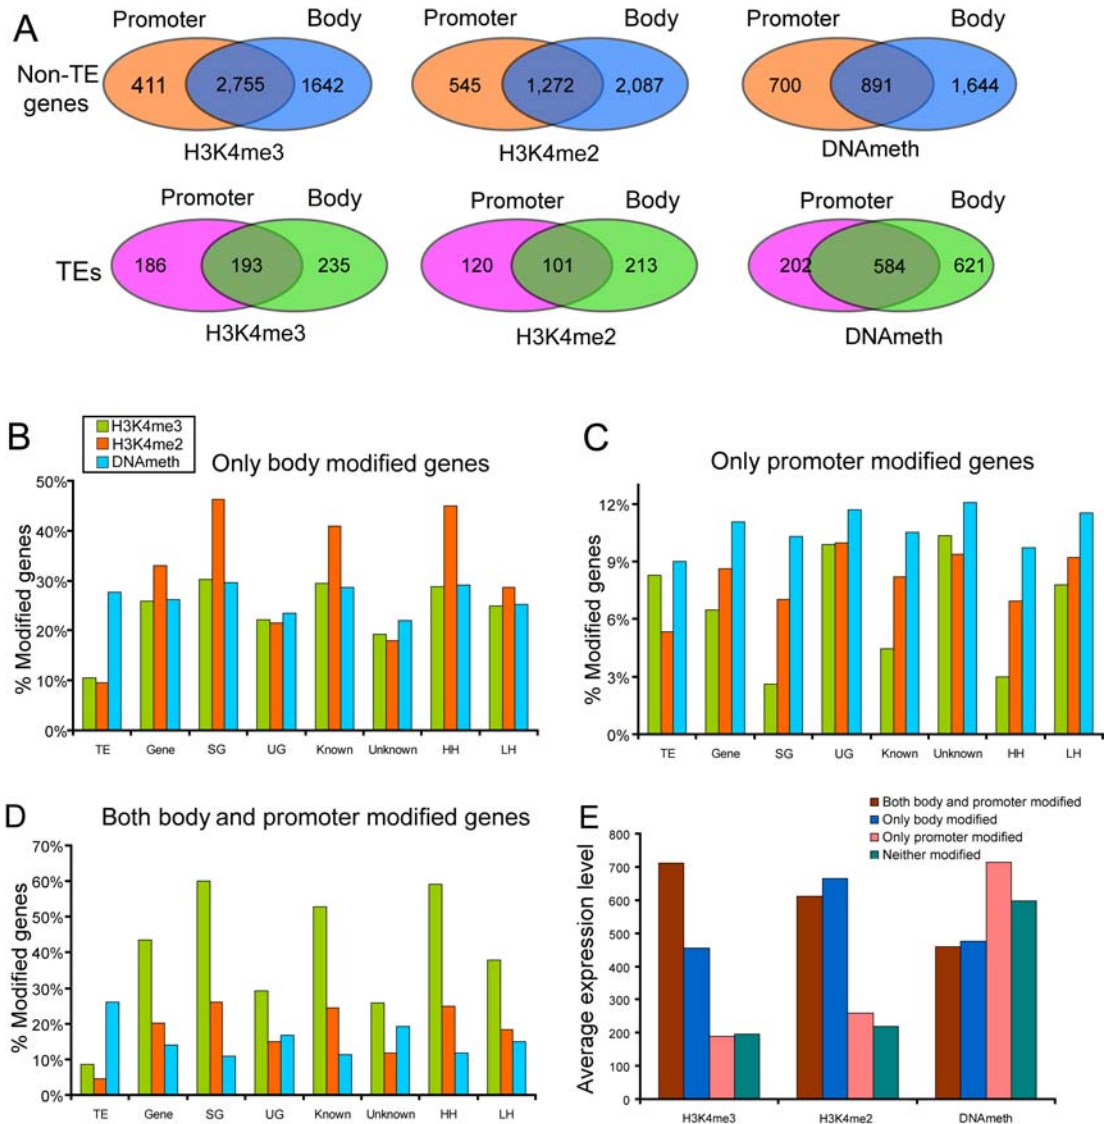

**Supplemental Figure 8. Occurrence of DNA methylation, H3K4me3 and H3K4me2 in promoter or body regions of genes in cultured rice cells.**

(A) Numbers of genes or TEs that have only promoters modified, only bodies modified or both promoters and bodies modified by H3K4me3, H3K4me2 or DNA methylation.

(B) Proportions of genes modified only in their bodies. All the protein-coding genes were classified into three pairs of categories: fl-cDNA or EST supported genes (SG) vs. unsupported predicted genes (UG); genes with known or predictable functions (Known) vs. genes of unknown function (Unknown) and genes with high homology to Arabidopsis (HH) vs. genes with low homology (LH).

(C) Proportions of genes modified only in their promoters

(D) Proportions of genes modified in both bodies and promoters

(E) Expression levels of genes modified in both body and promoter, body only, promoter only or unmodified by H3K4me3, H3K4me2 or DNA methylation

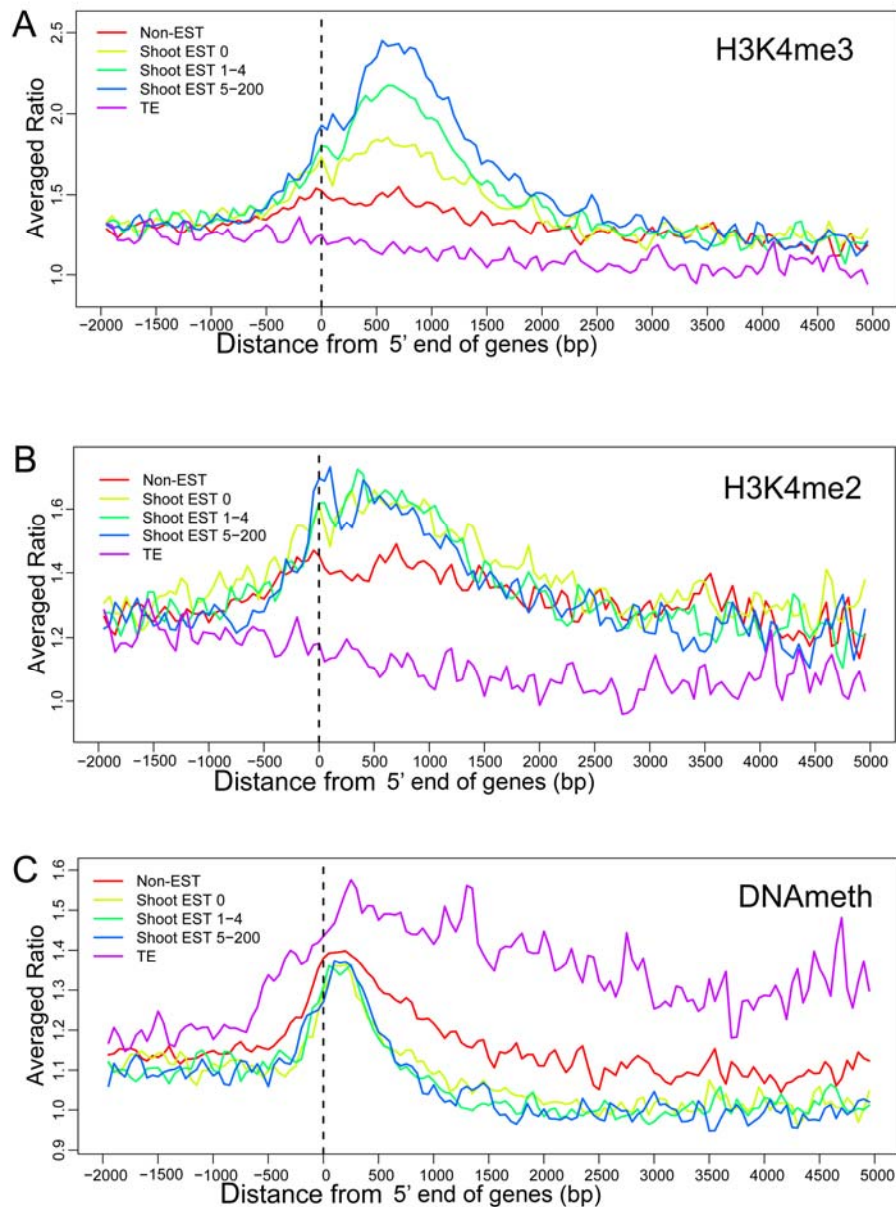

**Supplemental Figure 9. Correlation between H3K4me3, H3K4me2 and DNA methylation and gene expression estimated from EST frequencies in rice shoots.**

Genes on rice chromosomes 4 and 10 were divided into three categories: TE (transposable elements); Non-EST supported genes (no EST evidence in any rice tissues); and EST-supported genes. EST-supported genes were further divided into three groups: EST 0 (EST was detected in other tissues but not in leaf); EST 1-4; and EST 5-200 according to their EST frequency in the TIGR Rice Gene Expression Anatomy Viewer, <http://www.tigr.org/tdb/e2k1/osa1/dnav.shtml>. (A), (B) and (C). Distribution of H3K4me3, H3K4me2, and DNA methylation within aligned highly expressed, moderately expressed, weakly expressed and non-expressed rice genes. TEs were used as reference. Y-axis = averaged ratios of the signals from the samples enriched for each modification to the signal from total genomic DNA.

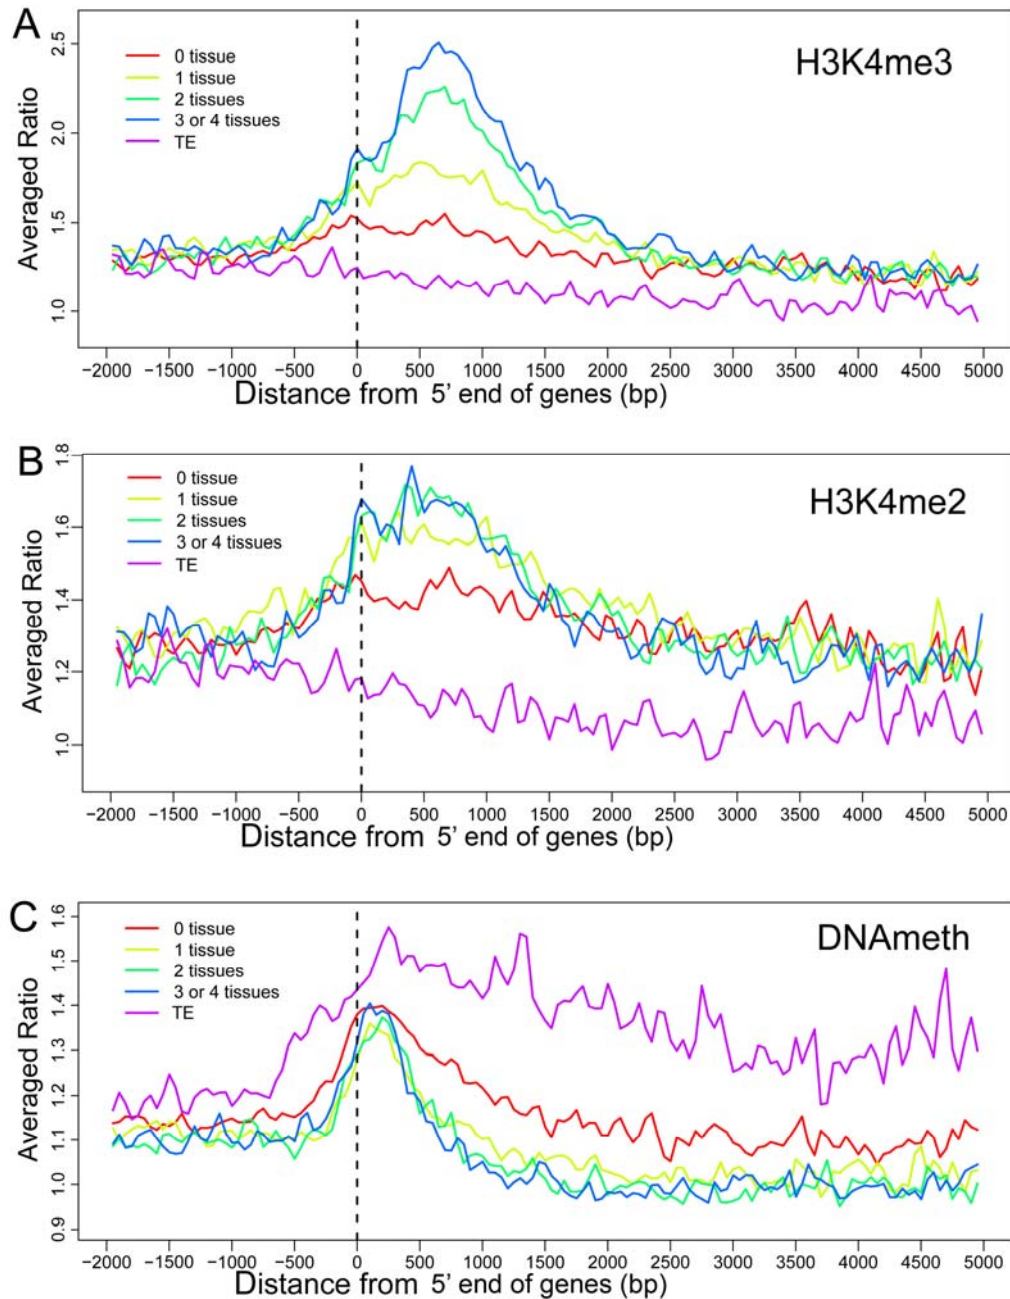

**Supplemental Figure 10. Correlation of H3K4me3, H3K4me2 and DNA methylation with tissue-specificity of gene expression.**

We chose the four tissues with the largest pools of ESTs in the TIGR Rice Gene Expression Anatomy Viewer, <http://www.tigr.org/tdb/e2k1/osa1/dnav.shtml>: panicle (150845), leaf (204353), root (79340) and callus (184189), and divided the genes on chromosomes 4 and 10 into four groups based on whether their ESTs were found in 0, 1, 2, or 3-4 of these tissue types. (A), (B) and (C). Distribution of H3K4me3, H3K4me2, and DNA methylation within aligned rice genes expressed in 0, 1, 2 or 3-4 tissue types. TEs were used as reference. Y-axis = averaged ratios of the signals from the samples enriched for each modification to the signal from total genomic DNA.

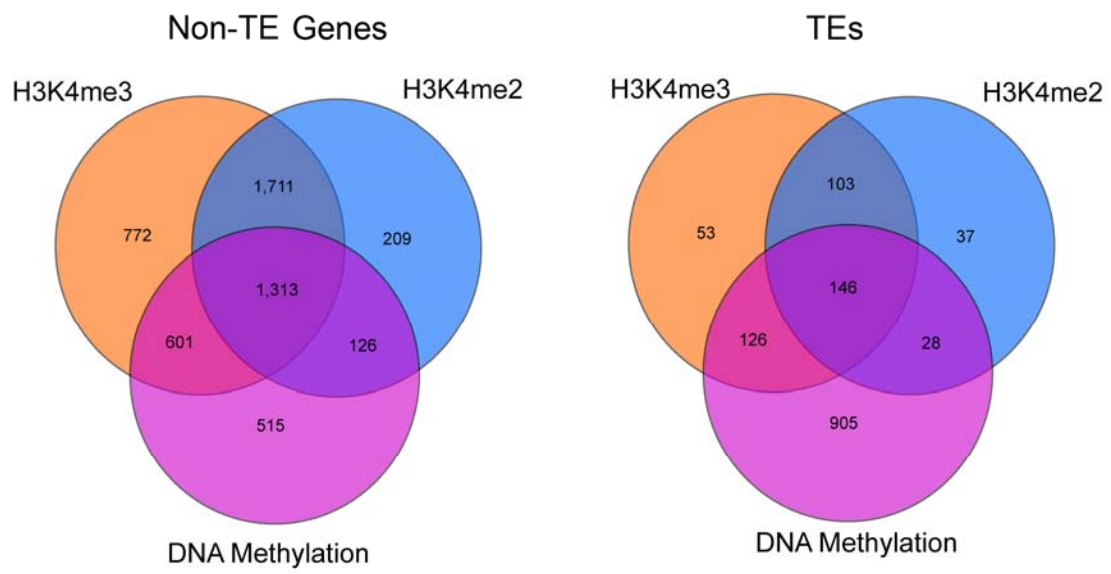

**Supplemental Figure 11.** Numbers of Transposable Elements and non-TE genes containing H3K4me3, H3K4me2 and DNA methylation regions and various combinations thereof in cultured rice cells

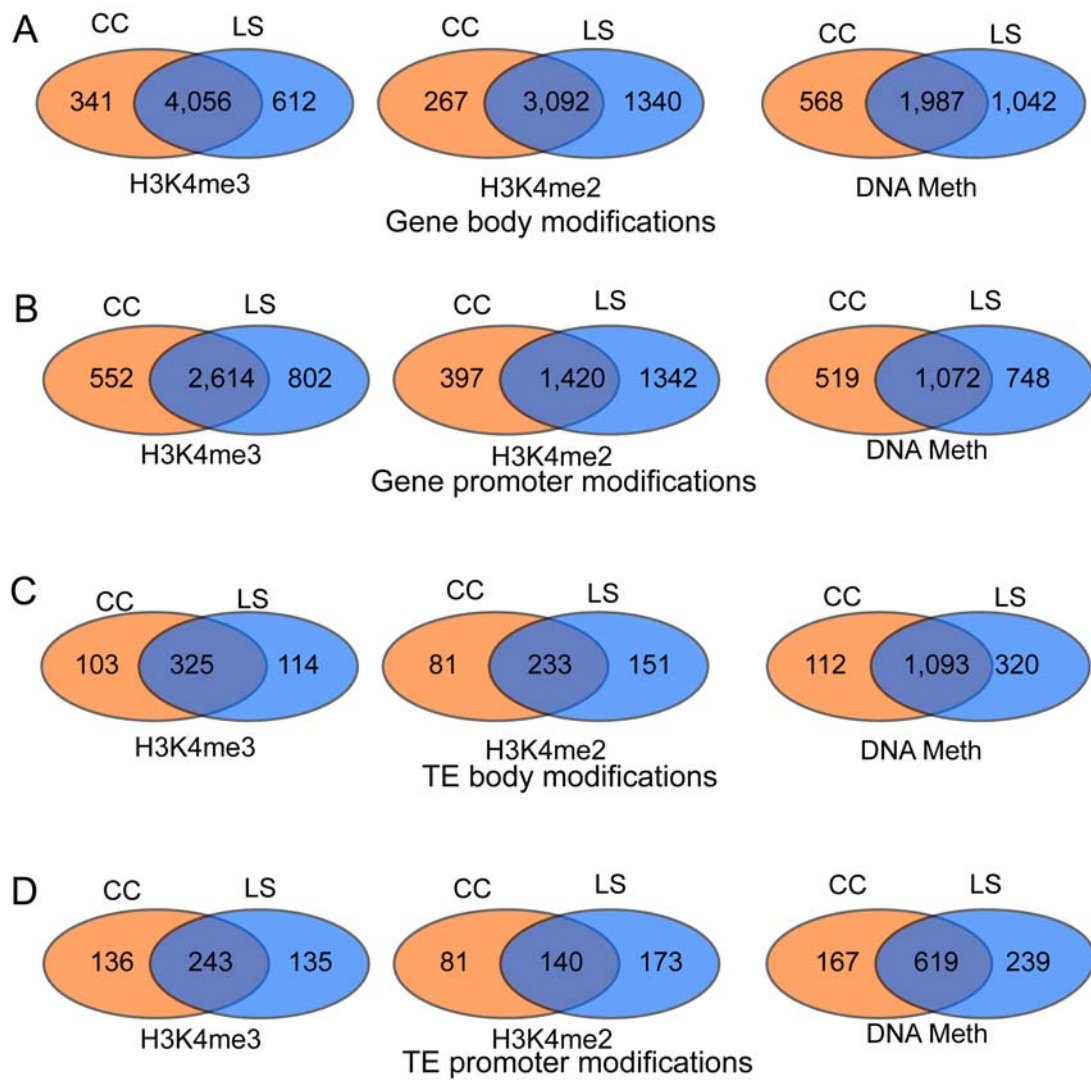

**Supplemental Figure 12. Numbers of TEs and non-TE genes that are differentially modified by H3K4me3, H3K4me2 or DNA methylation in light-grown rice shoots (LS) and cultured cells (CC). Cyan = modified only in LS, orange = modified only in CC, intersection = modified in both.**

- A) Non-TE genes with modified bodies.
- B) Non-TE genes with modified promoters.
- C) TEs with modified bodies.
- D) TEs with modified promoters.

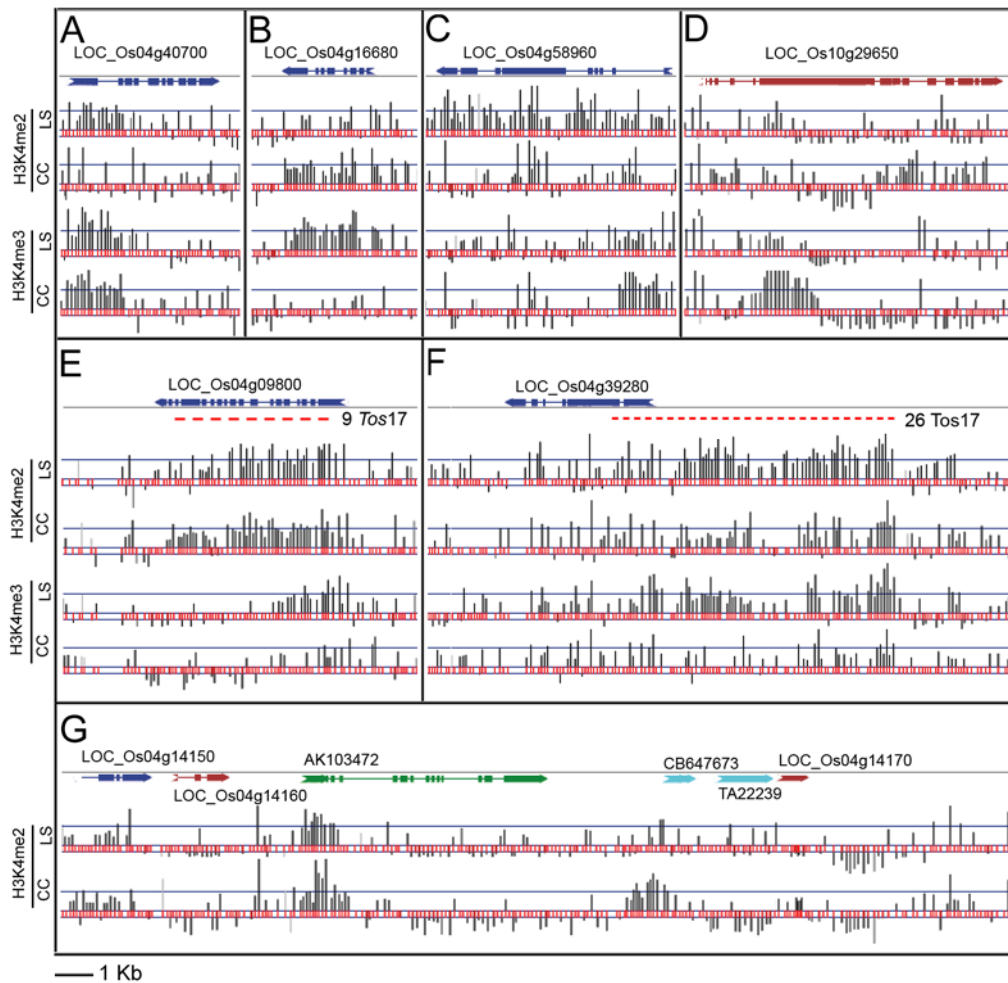

**Supplemental Figure 13. Examples of differentially-modified genes, *Tos17* insertion sites and intergenic modifications in light-grown rice shoots (LS) and cultured cells (CC).**

Y-axis (black vertical lines) = modification level, i.e. the ratios of the signal from the samples enriched for each modification to the signal from total genomic DNA for each probe. X-axis = position on chromosome. Red lines represent positions covered by probes.

(A) Gene LOC\_Os04g40700: putative nuclear steroid receptor

(B) Gene LOC\_Os04g16680: sedoheptulose-1,7-bisphosphatase

(C) Gene LOC\_Os04g58960: Ran GTPase binding protein

(D) Gene LOC\_Os10g29650: an endogenous copia-like retrotransposon *Tos17* which has been reported to be activated during tissue culture but inactivated again in regenerated plants (Miyao et al., 2003).

(E), (F) Examples of *Tos-17* retrotransposon insertions in regions of elevated H3K4me2.

(G) An example of intergenic H3K4me2 regions corresponding to an un-annotated full length cDNA (AK103472) and an intergenic EST (CB647673).

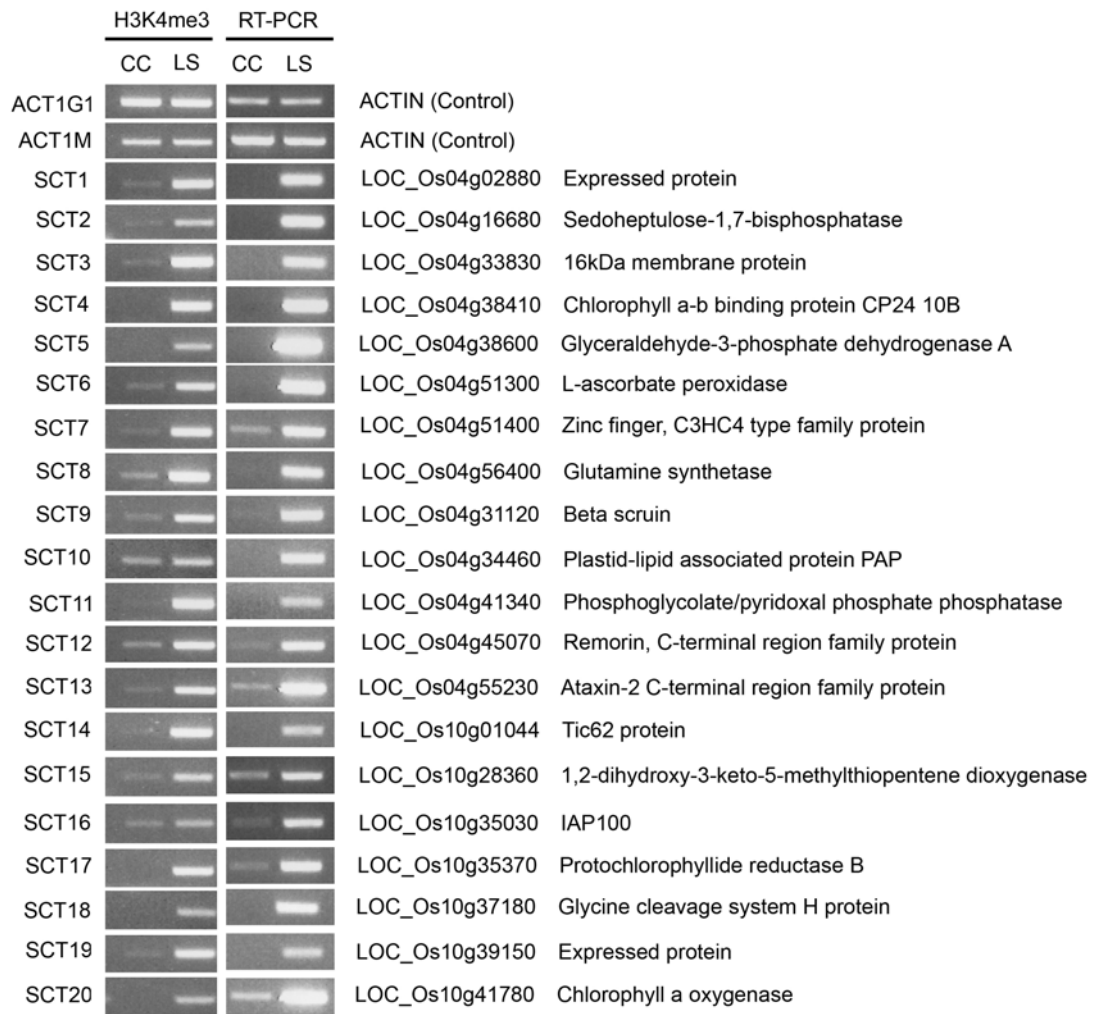

**Supplemental Figure 14. Confirmation of the positive correlation between H3K4me3 and transcript abundance. More H3K4me3 in light-grown shoots (LS) than in cultured cells (CC) correlate with more transcripts in LS than in CC.**

Left column = ChIP-PCR analysis of each gene on samples prepared from LS and CC with anti-H3K4me3

Right column = RT-PCR analysis of each gene on samples prepared from LS and CC  
ChIP-PCR and RT-PCR were performed as described in “methods”

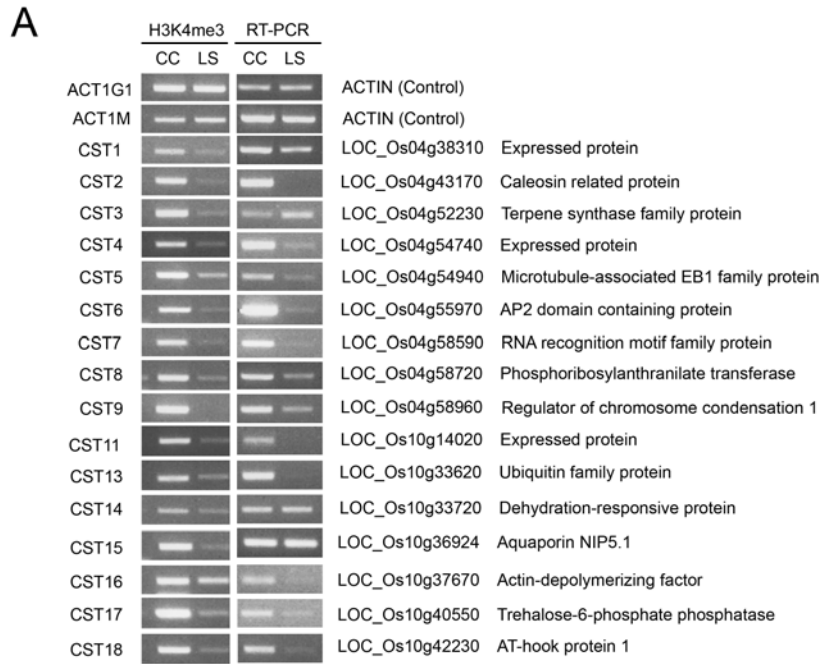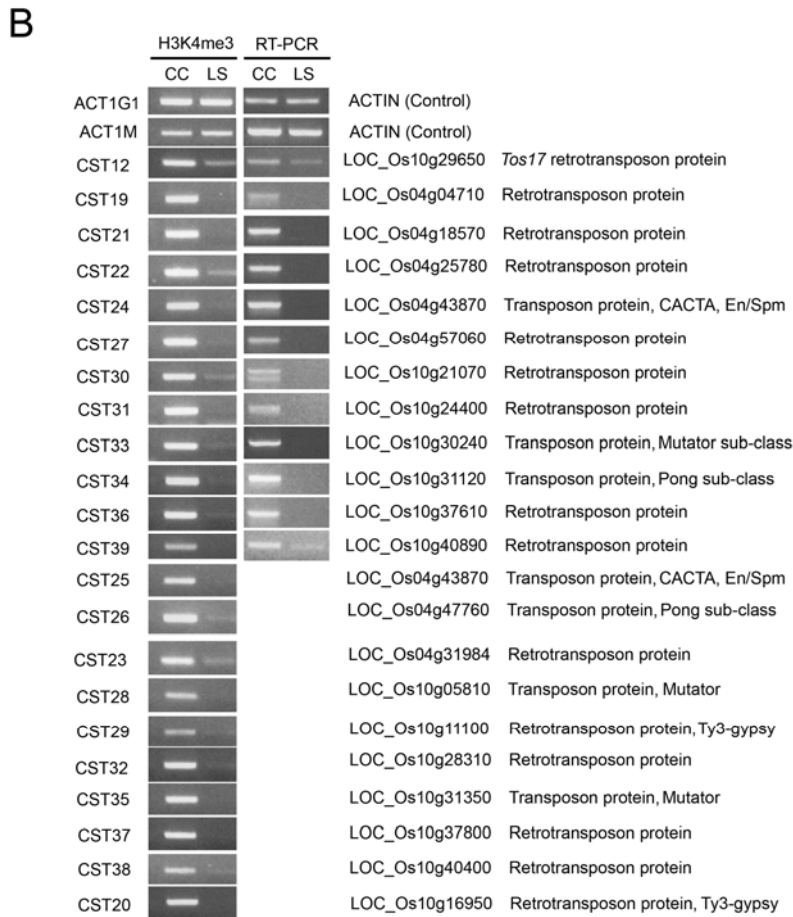

**Supplemental Figure 15. Confirmation of the positive correlation between H3K4me3 and transcript abundance. More H3K4me3 in cultured cells (CC) than in light-grown shoots (LS) correlate with more transcripts in CC than in LS. (A) Protein coding genes; (B) Transposons.**



Left column = ChIP-PCR analysis of each gene on samples prepared from LS and CC with anti-H3K4me3

Right column = RT-PCR analysis of each gene on samples prepared from LS and CC

ChIP-PCR and RT-PCR were performed as described in “methods”

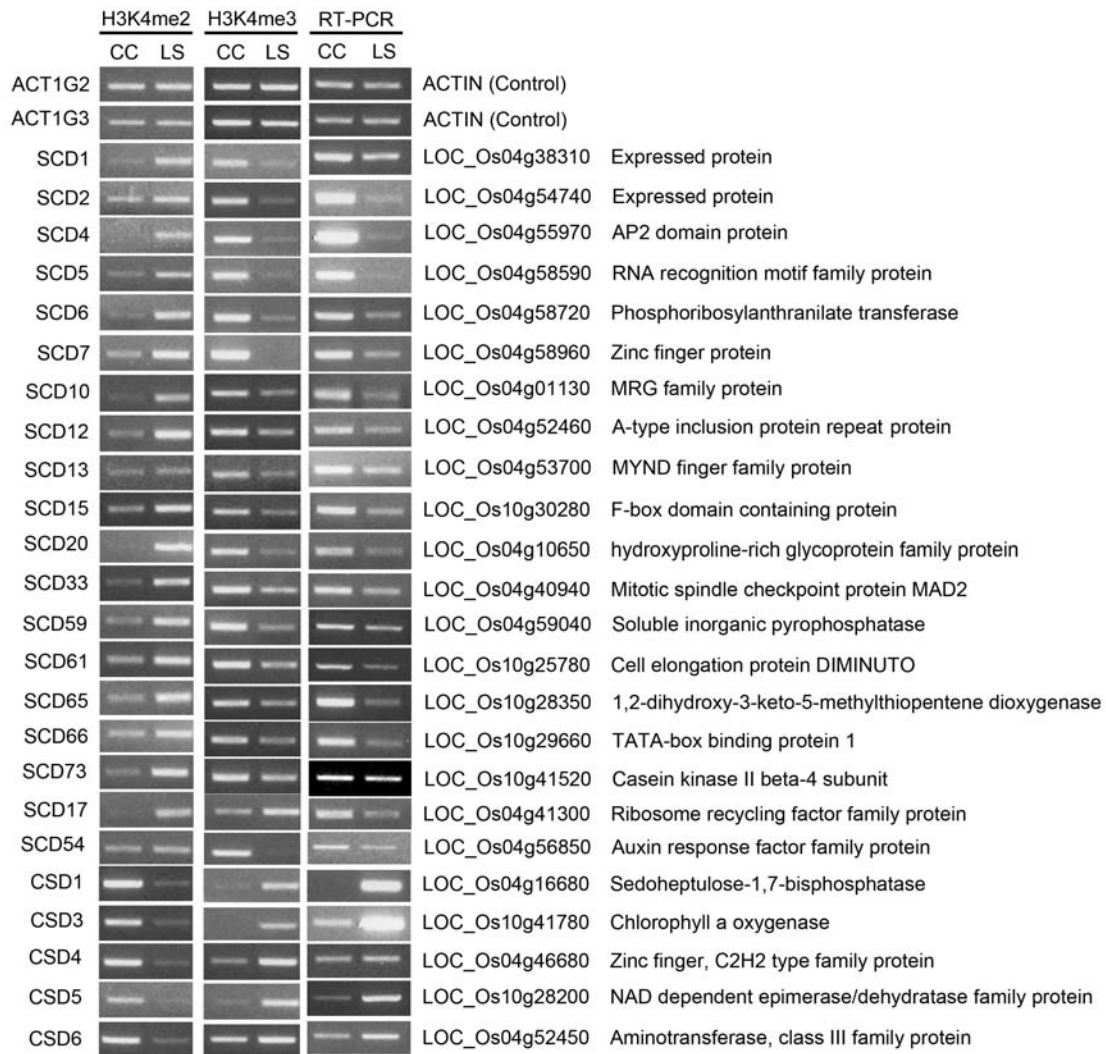

**Supplemental Figure 16. The levels of H3K4me3 rather than H3K4me2 positively correlate with transcript abundance.**

Left column = ChIP-PCR analysis of each gene on samples prepared from LS and CC with anti-H3K4me2

Center column = ChIP-PCR analysis of each gene on samples prepared from LS and CC with anti-H3K4me3

Right column = RT-PCR analysis of each gene on samples prepared from LS and CC  
ChIP-PCR and RT-PCR were performed as described in “methods”

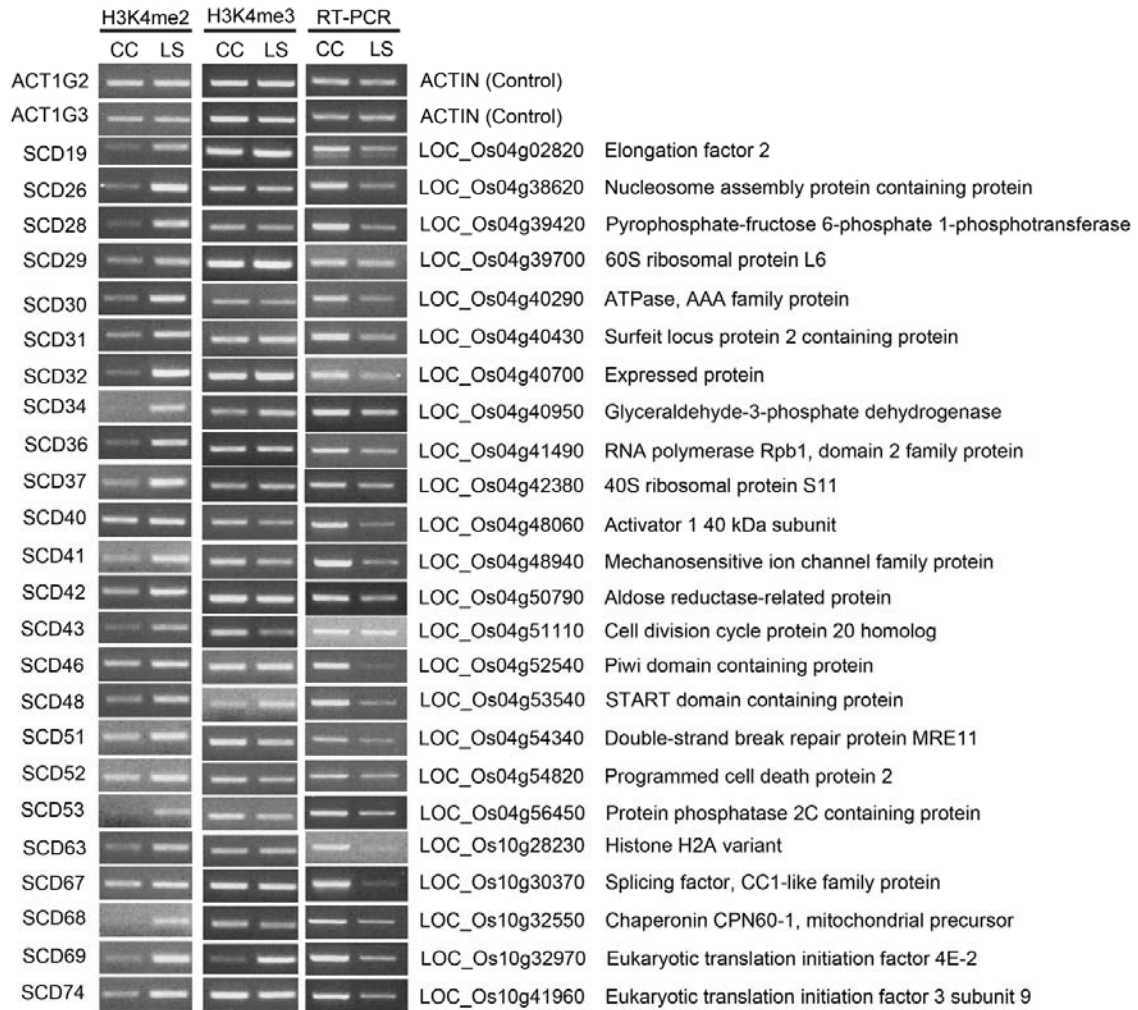

**Supplemental Figure 17. The levels of H3K4me2 correlate with reduced gene expression in light-grown shoots (LS) and cultured cells (CC) if both tissues have equal levels of H3K4me3.**

Left column = ChIP-PCR analysis of each gene on samples prepared from LS and CC with anti-H3K4me2

Center column = ChIP-PCR analysis of each gene on samples prepared from LS and CC with anti-H3K4me3

Right column = RT-PCR analysis of each gene on samples prepared from LS and CC  
ChIP-PCR and RT-PCR were performed as described in “methods”

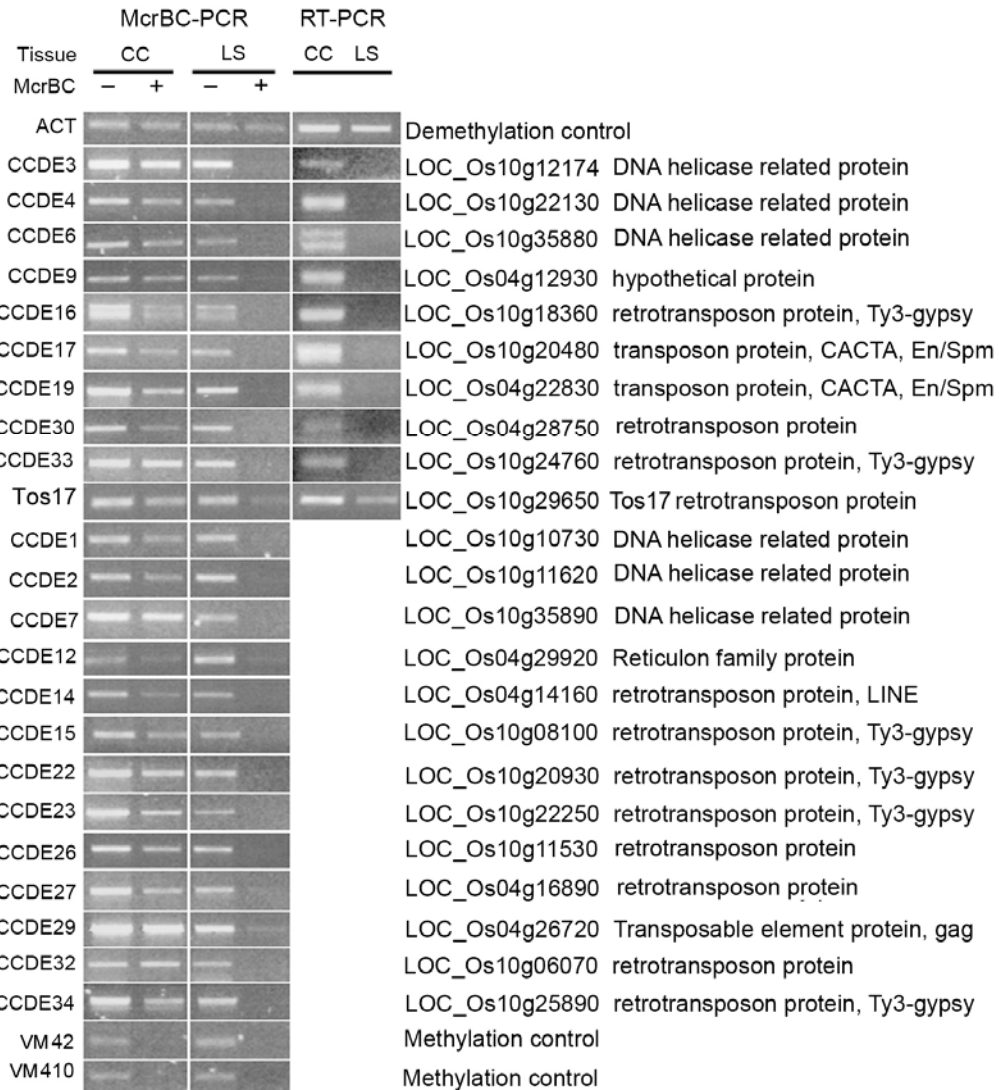

**Supplemental Figure 18. DNA hypomethylation correlates with increased transcription in cultured rice cells (CC) as compared with light-grown shoots (LS).**

Left column = McrBC-PCR analysis of each gene on samples prepared from CC. “-“ = treated with heat-inactivated McrBC, “+” = treated with intact McrBC.

Center column = McrBC-PCR analysis of each gene on samples prepared from LS. - “-“ = treated with heat-inactivated McrBC, “+” = treated with intact McrBC.

Right column = RT-PCR analysis of each gene on samples prepared from LS and CC  
McrBC-PCR and RT-PCR were performed as described in “methods.”

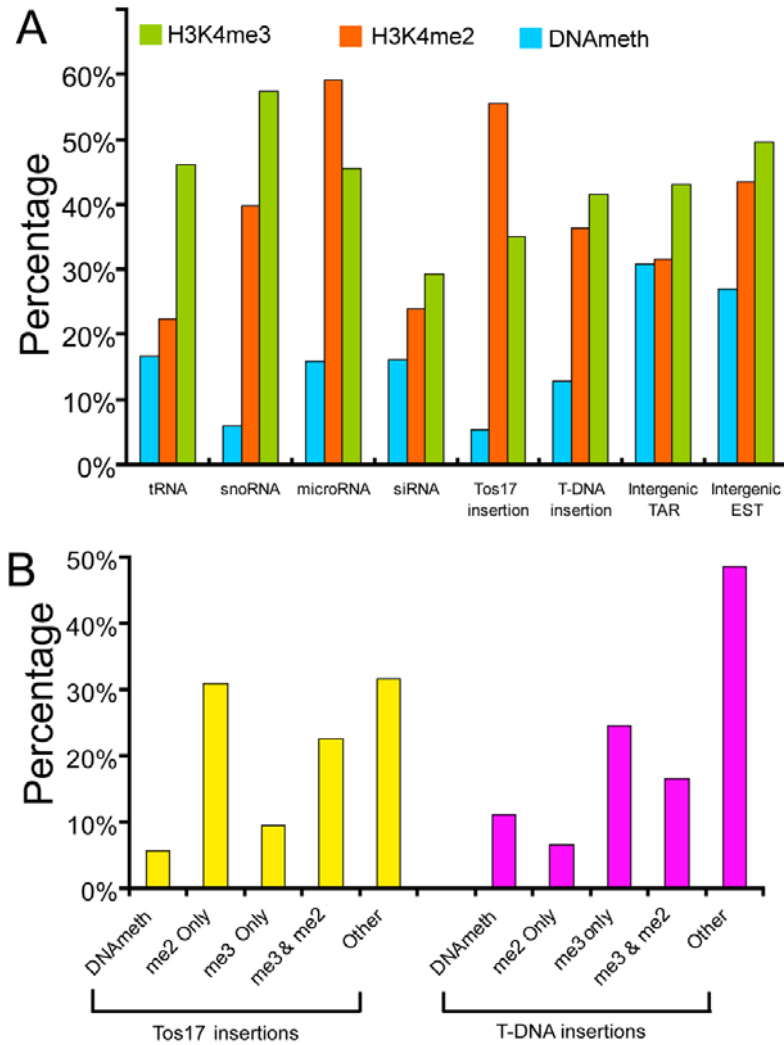

**Supplemental Figure 19. Mapping H3K4me3, H3K4me2 and DNA methylation regions onto other genomic elements in cultured rice cells.**

(A) Percentages of tRNA, snoRNA, microRNA, siRNA, Tos17 and T-DNA insertions, intergenic TARs and ESTs that overlap with H3K4me3, H3K4me2 and DNA methylation regions.

(B) Frequencies of Tos17 and T-DNA insertions occurring in H3K4me3, H3K4me2 and DNA methylation regions

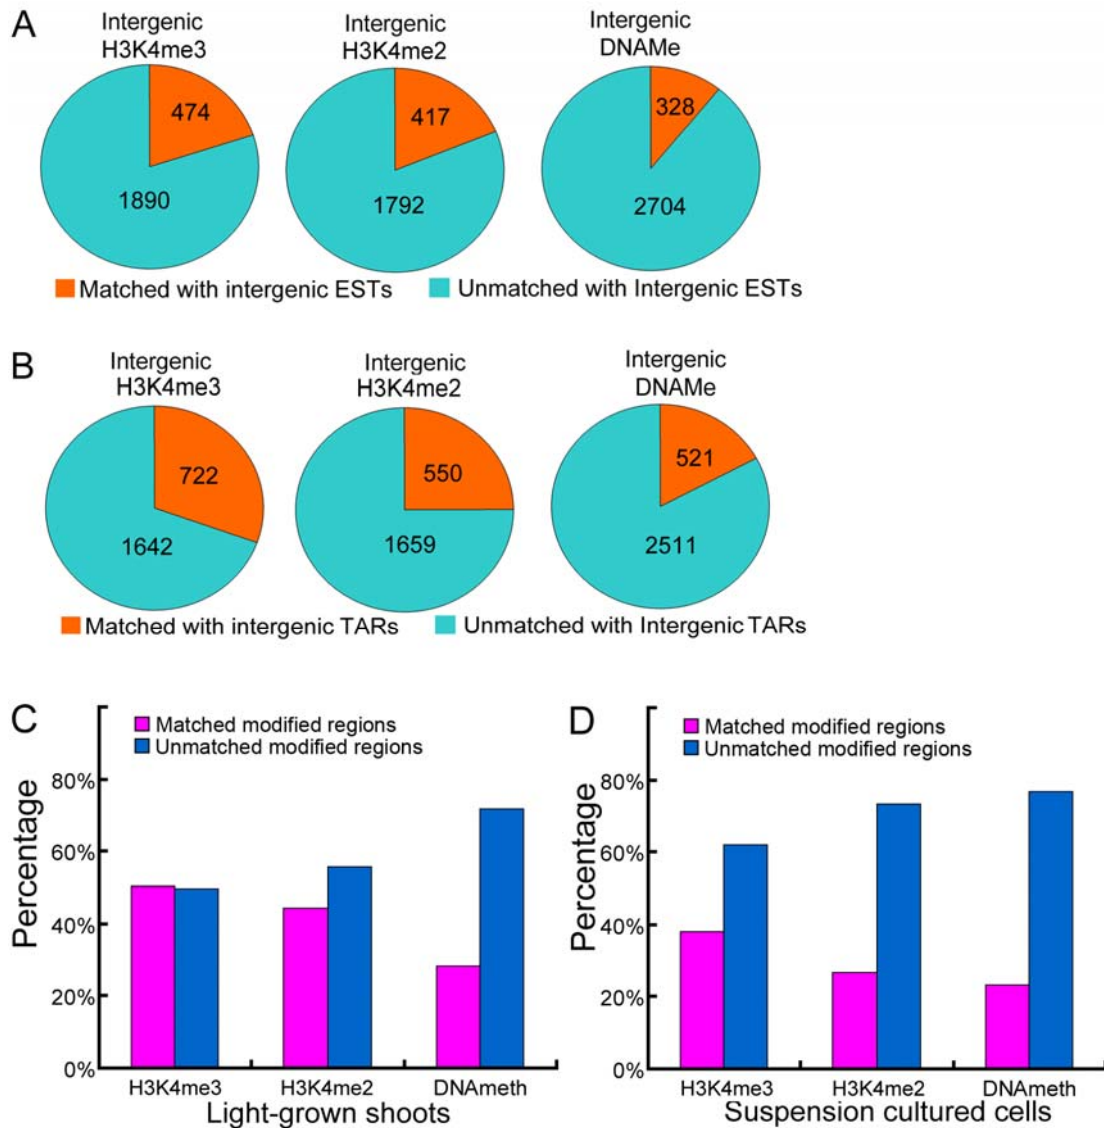

**Supplemental Figure 20. Mapping intergenic epigenetically-modified regions against intergenic TAR and EST.**

(A) Proportions of intergenic H3K4me3, H3K4me2 and DNA methylation regions that match intergenic ESTs (including full-length cDNAs).

(B) Proportions of intergenic H3K4me3, H3K4me2 and DNA methylation regions that match intergenic transcriptionally-active regions (TAR).

(C) and (D) Percentages of intergenic H3K4me3, H3K4me2 and DNA methylation regions that match intergenic transcribed sequences (EST, TAR and ncRNA) and those that do not in rice shoots and cultured cells.

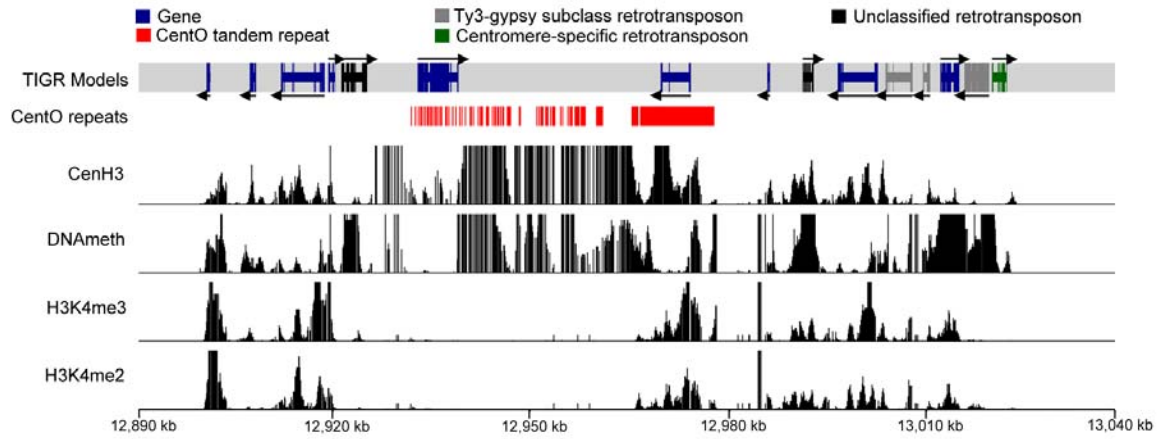

**Supplemental Figure 21. Epigenetic modifications of rice centromere 8. Rows 3-6**

**=  $\log_{10}$ -transformed p values for each probe.**

The locus ID numbers for the TE and non-TE gene models are summarized in Supplemental Table

3.

**Supplemental Table 1.** Coverage of three epigenetic modifications on chromosome 4 and 10.

H: Heterochromatin; E: Euchromatin; W: whole chromosome; LS: light shoot; CC: Cultured cells

|         | Genomic length | DNA Methylation (CC) |               |         | H3K4me2 (CC)  |               |         | H3K4me3 (CC)  |               |         |
|---------|----------------|----------------------|---------------|---------|---------------|---------------|---------|---------------|---------------|---------|
|         |                | Region number        | Region length | Percent | Region number | Region length | Percent | Region number | Region length | Percent |
| Chr.4H  | 17,500,000     | 2,394                | 2,682,539     | 15.33%  | 1,541         | 1,531,634     | 8.75%   | 1,880         | 2,253,821     | 12.88%  |
| Chr.4E  | 17,744,269     | 2,640                | 2,262,198     | 12.75%  | 3,387         | 3,541,006     | 19.96%  | 3,905         | 6,108,126     | 34.42%  |
| Chr.4W  | 35,244,269     | 5,034                | 4,944,737     | 14.03%  | 4,928         | 5,072,640     | 14.39%  | 5,785         | 8,361,947     | 23.73%  |
| Chr.10H | 12,500,000     | 1,782                | 1,848,022     | 14.78%  | 1,467         | 1,534,010     | 12.27%  | 1,736         | 2,129,529     | 17.04%  |
| Chr.10E | 10,376,596     | 1,410                | 1,240,139     | 11.95%  | 1,782         | 1,839,527     | 17.73%  | 2,026         | 3,100,646     | 29.88%  |
| Chr.10W | 22,876,596     | 3,192                | 3,088,161     | 13.50%  | 3,249         | 3,373,537     | 14.75%  | 3,762         | 5,230,175     | 22.86%  |

|         | Genomic length | DNA Methylation (LS) |               |         | H3K4me2 (LS)  |               |         | H3K4me3 (LS)  |               |         |
|---------|----------------|----------------------|---------------|---------|---------------|---------------|---------|---------------|---------------|---------|
|         |                | Region number        | Region length | Percent | Region number | Region length | Percent | Region number | Region length | Percent |
| Chr.4H  | 17,500,000     | 2,703                | 3,172,193     | 18.13%  | 1,694         | 1,960,473     | 11.20%  | 1,780         | 2,315,408     | 13.23%  |
| Chr.4E  | 17,744,269     | 2,791                | 2,516,995     | 14.18%  | 3,443         | 5,477,057     | 30.87%  | 3,270         | 6,261,685     | 35.29%  |
| Chr.4W  | 35,244,269     | 5,494                | 5,689,188     | 16.14%  | 5,137         | 7,437,530     | 21.10%  | 5,050         | 8,577,093     | 24.34%  |
| Chr.10H | 12,500,000     | 1,965                | 2,150,596     | 17.20%  | 1,487         | 1,875,041     | 15.00%  | 1,579         | 2,132,991     | 17.06%  |
| Chr.10E | 10,376,596     | 1,517                | 1,452,326     | 13.99%  | 1,865         | 2,859,182     | 27.55%  | 1,873         | 3,366,749     | 32.45%  |
| Chr.10W | 22,876,596     | 3,482                | 3,602,922     | 15.75%  | 3,352         | 4,734,223     | 20.69%  | 3,452         | 5,499,740     | 24.04%  |



**Supplemental Table 2.** Percentages of different classes of genes that are modified only in body, only in promoter or in both body and promoter.

**Supplemental Table 2.1** Only body modified genes (Cultured cells)

| Type    | H3K4me3 |          |            | H3K4me2  |            | DNA Methylation |            |
|---------|---------|----------|------------|----------|------------|-----------------|------------|
|         | Total   | Modified | Percentage | Modified | Percentage | Modified        | Percentage |
| TE      | 2248    | 235      | 10.45%     | 213      | 9.48%      | 621             | 27.62%     |
| Gene    | 6329    | 1642     | 25.94%     | 2087     | 32.98%     | 1664            | 26.29%     |
| SG      | 2934    | 887      | 30.23%     | 1359     | 46.32%     | 867             | 29.55%     |
| UG      | 3395    | 755      | 22.24%     | 728      | 21.44%     | 797             | 23.48%     |
| Known   | 4136    | 1220     | 29.50%     | 1692     | 40.91%     | 1183            | 28.60%     |
| Unknown | 2193    | 422      | 19.24%     | 395      | 18.01%     | 481             | 21.93%     |
| HH      | 1684    | 485      | 28.80%     | 757      | 44.95%     | 490             | 29.10%     |
| LH      | 4645    | 1157     | 24.91%     | 1330     | 28.63%     | 1174            | 25.27%     |

**Supplemental Table 2.2** Only body modified genes (Light-grown shoots)

| Type    | H3K4me3 |          |            | H3K4me2  |            | DNA Methylation |            |
|---------|---------|----------|------------|----------|------------|-----------------|------------|
|         | Total   | Modified | Percentage | Modified | Percentage | Modified        | Percentage |
| TE      | 2248    | 256      | 11.39%     | 236      | 10.50%     | 753             | 33.50%     |
| Gene    | 6329    | 1592     | 25.15%     | 2038     | 32.20%     | 1915            | 30.26%     |
| SG      | 2934    | 836      | 28.49%     | 1233     | 42.02%     | 956             | 32.58%     |
| UG      | 3395    | 756      | 22.27%     | 805      | 23.71%     | 959             | 28.25%     |
| Known   | 4136    | 1134     | 27.42%     | 1573     | 38.03%     | 1337            | 32.33%     |
| Unknown | 2193    | 458      | 20.88%     | 465      | 21.20%     | 578             | 26.36%     |
| HH      | 1684    | 446      | 26.48%     | 668      | 39.67%     | 557             | 33.08%     |
| LH      | 4645    | 1146     | 24.67%     | 1370     | 29.49%     | 1358            | 29.24%     |

**Supplemental Table 2.3** Only promoter modified genes (Cultured cells)

| Type    | H3K4me3 |          |            | H3K4me2  |            | DNA Methylation |            |
|---------|---------|----------|------------|----------|------------|-----------------|------------|
|         | Total   | Modified | Percentage | Modified | Percentage | Modified        | Percentage |
| TE      | 2248    | 186      | 8.27%      | 120      | 5.34%      | 202             | 8.99%      |
| Gene    | 6329    | 411      | 6.49%      | 545      | 8.61%      | 700             | 11.06%     |
| SG      | 2934    | 76       | 2.59%      | 206      | 7.02%      | 303             | 10.33%     |
| UG      | 3395    | 335      | 9.87%      | 339      | 9.99%      | 397             | 11.69%     |
| Known   | 4136    | 184      | 4.45%      | 339      | 8.20%      | 435             | 10.52%     |
| Unknown | 2193    | 227      | 10.35%     | 206      | 9.39%      | 265             | 12.08%     |
| HH      | 1684    | 50       | 2.97%      | 117      | 6.95%      | 164             | 9.74%      |
| LH      | 4645    | 361      | 7.77%      | 428      | 9.21%      | 536             | 11.54%     |

**Supplemental Table 2.4** Only promoter modified genes (Light-grown shoot)

| Type    | H3K4me3 |          |            | H3K4me2  |            | DNA Methylation |            |
|---------|---------|----------|------------|----------|------------|-----------------|------------|
|         | Total   | Modified | Percentage | Modified | Percentage | Modified        | Percentage |
| TE      | 2248    | 195      | 8.67%      | 165      | 7.34%      | 198             | 8.81%      |
| Gene    | 6329    | 340      | 5.37%      | 368      | 5.81%      | 706             | 11.16%     |
| SG      | 2934    | 45       | 1.53%      | 67       | 2.28%      | 318             | 10.84%     |
| UG      | 3395    | 295      | 8.69%      | 301      | 8.87%      | 388             | 11.43%     |
| Known   | 4136    | 134      | 3.24%      | 157      | 3.80%      | 442             | 10.69%     |
| Unknown | 2193    | 206      | 9.39%      | 211      | 9.62%      | 264             | 12.04%     |
| HH      | 1684    | 44       | 2.61%      | 57       | 3.38%      | 163             | 9.68%      |
| LH      | 4645    | 296      | 6.37%      | 311      | 6.70%      | 543             | 11.69%     |

**Supplemental Table 2.5** Both promoter and body modified genes (Cultured cells)

| Type    | H3K4me3 |          |            | H3K4me2  |            | DNA Methylation |            |
|---------|---------|----------|------------|----------|------------|-----------------|------------|
|         | Total   | Modified | Percentage | Modified | Percentage | Modified        | Percentage |
| TE      | 2248    | 193      | 8.59%      | 101      | 4.49%      | 584             | 25.98%     |
| Gene    | 6329    | 2755     | 43.53%     | 1272     | 20.10%     | 891             | 14.08%     |
| SG      | 2934    | 1762     | 60.05%     | 766      | 26.11%     | 319             | 10.87%     |
| UG      | 3395    | 993      | 29.25%     | 506      | 14.90%     | 572             | 16.85%     |
| Known   | 4136    | 2187     | 52.88%     | 1014     | 24.52%     | 468             | 11.32%     |
| Unknown | 2193    | 568      | 25.90%     | 258      | 11.76%     | 423             | 19.29%     |
| HH      | 1684    | 994      | 59.03%     | 418      | 24.82%     | 200             | 11.88%     |
| LH      | 4645    | 1761     | 37.91%     | 854      | 18.39%     | 691             | 14.88%     |

**Supplemental Table 2.6** Both promoter and body modified genes (Light-grown shoots)

| Type    | H3K4me3 |          |            | H3K4me2  |            | DNA Methylation |            |
|---------|---------|----------|------------|----------|------------|-----------------|------------|
|         | Total   | Modified | Percentage | Modified | Percentage | Modified        | Percentage |
| TE      | 2248    | 183      | 8.14%      | 148      | 6.58%      | 660             | 29.36%     |
| Gene    | 6329    | 3076     | 48.60%     | 2394     | 37.83%     | 1114            | 17.60%     |
| SG      | 2934    | 1904     | 64.89%     | 1431     | 48.77%     | 422             | 14.38%     |
| UG      | 3395    | 1172     | 34.52%     | 963      | 28.37%     | 692             | 20.38%     |
| Known   | 4136    | 2432     | 58.80%     | 1890     | 45.70%     | 592             | 14.31%     |
| Unknown | 2193    | 644      | 29.37%     | 504      | 22.98%     | 522             | 23.80%     |
| HH      | 1684    | 1071     | 63.60%     | 806      | 47.86%     | 253             | 15.02%     |
| LH      | 4645    | 2005     | 43.16%     | 1588     | 34.19%     | 861             | 18.54%     |

**Supplemental Table 3:** Annotated gene models in the core region of centromeres 4 and 8.

| Chromosome | Locus ID       | 5'End    | 3'End    | Strand | Annotation                                          |
|------------|----------------|----------|----------|--------|-----------------------------------------------------|
| Chr04      | LOC_Os04g17780 | 9718249  | 9722555  | -      | retrotransposon, putative, centromere-specific      |
| Chr04      | LOC_Os04g17789 | 9724700  | 9727793  | -      | retrotransposon, putative, centromere-specific      |
| Chr04      | LOC_Os04g17798 | 9729263  | 9729974  | -      | retrotransposon, putative, centromere-specific      |
| Chr04      | LOC_Os04g17810 | 9742138  | 9742852  | +      | retrotransposon, putative, centromere-specific      |
| Chr04      | LOC_Os04g17820 | 9744325  | 9745743  | +      | retrotransposon, putative, centromere-specific      |
| Chr04      | LOC_Os04g17830 | 9750966  | 9752316  | +      | retrotransposon, putative, centromere-specific      |
| Chr04      | LOC_Os04g17840 | 9756597  | 9762105  | -      | retrotransposon protein, putative, Ty3-gypsy        |
| Chr04      | LOC_Os04g17850 | 9770720  | 9776997  | +      | retrotransposon protein, putative, Ty3-gypsy        |
| Chr04      | LOC_Os04g17860 | 9781226  | 9785710  | -      | retrotransposon protein, putative, Ty3-gypsy        |
| Chr04      | LOC_Os04g17870 | 9797368  | 9797898  | +      | retrotransposon protein, putative, Ty3-gypsy        |
| Chr04      | LOC_Os04g17880 | 9798286  | 9800256  | -      | retrotransposon protein, putative, Ty3-gypsy        |
| Chr04      | LOC_Os04g17890 | 9805511  | 9813368  | +      | retrotransposon protein, putative, Ty3-gypsy        |
| Chr04      | LOC_Os04g17900 | 9820140  | 9823640  | +      | hypothetical protein                                |
| Chr04      | LOC_Os04g17910 | 9824244  | 9825961  | -      | retrotransposon protein, putative, Ty3-gypsy        |
| Chr04      | LOC_Os04g17920 | 9827937  | 9830041  | +      | retrotransposon, putative, centromere-specific      |
| Chr04      | LOC_Os04g17930 | 9831403  | 9832481  | -      | retrotransposon protein, putative, Ty3-gypsy        |
| Chr04      | LOC_Os04g17940 | 9837666  | 9842628  | -      | retrotransposon protein, putative, Ty3-gypsy        |
| Chr04      | LOC_Os04g17950 | 9846312  | 9847451  | -      | retrotransposon, putative, centromere-specific      |
| Chr04      | LOC_Os04g17960 | 9855307  | 9857450  | +      | retrotransposon protein, putative, unclassified     |
| Chr04      | LOC_Os04g17970 | 9858207  | 9859185  | +      | retrotransposon protein, putative, unclassified     |
| Chr04      | LOC_Os04g17980 | 9859516  | 9862122  | +      | hypothetical protein                                |
| Chr08      | LOC_Os08g21650 | 12890422 | 12890983 | -      | hypothetical protein                                |
| Chr08      | LOC_Os08g21654 | 12897059 | 12898002 | -      | hypothetical protein                                |
| Chr08      | LOC_Os08g21660 | 12901844 | 12908539 | -      | Eukaryotic translation initiation factor 3 subunit2 |
| Chr08      | LOC_Os08g21670 | 12909107 | 12910163 | +      | hypothetical protein                                |
| Chr08      | LOC_Os08g21680 | 12911115 | 12915059 | +      | Transposable element protein, Retrotrans_gag        |
| Chr08      | LOC_Os08g21690 | 12922825 | 12929089 | +      | retrotransposon protein, Ty3-gypsy                  |
| Chr08      | LOC_Os08g21700 | 12960165 | 12964786 | -      | DCL protein, chloroplast precursor, expressed       |
| Chr08      | LOC_Os08g21710 | 12969782 | 12971899 | +      | hypothetical protein                                |
| Chr08      | LOC_Os08g21720 | 12976544 | 12976962 | -      | MYST1, putative                                     |
| Chr08      | LOC_Os08g21740 | 12981981 | 12983647 | +      | retrotransposon protein, putative, unclassified     |
| Chr08      | LOC_Os08g21760 | 12987359 | 12993517 | -      | RERIC protein, putative, expressed                  |
| Chr08      | LOC_Os08g21770 | 12994697 | 12998846 | -      | retrotransposon protein, putative, Ty3-gypsy        |
| Chr08      | LOC_Os08g21780 | 12999660 | 13001544 | -      | retrotransposon protein, putative, Ty3-gypsy        |
| Chr08      | LOC_Os08g21790 | 13003127 | 13006000 | +      | hypothetical protein                                |
| Chr08      | LOC_Os08g21800 | 13006829 | 13010601 | -      | retrotransposon protein, putative, Ty3-gypsy        |
| Chr08      | LOC_Os08g21804 | 13011043 | 13013330 | +      | retrotransposon, putative, centromere-specific      |

**Supplemental Table 4.** Primers used in MerBC -PCR, ChIP-PCR, RT-PCR and genomic bisulfite sequencing.**Supplemental Table 4.1** MerBC-PCR primers for validation of DNA methylated regions

| Name  | Primer L              | Primer R              |
|-------|-----------------------|-----------------------|
| UBQ1  | TAGTTGCTGACCATGCTTCG  | TCCATTGGGAGACAATAGGC  |
| ACT1  | GCCGTCCTCTCTGTATGC    | GGCAAGCAACATTGTAAGCA  |
| VM11  | TTTTGTTGCTTGAGCATCG   | GGGCTCCACAGTCATTTGTT  |
| VM24  | TTAATTCAACGGCTCCTTGG  | AGACTCGCATCCAAATCCAG  |
| VM29  | CGGCGAACTCTTGTCAGTTA  | CCACCTGCTACACTGCTGAC  |
| VM37  | GCGATGTTTTCGACAGGAAA  | CGTTTCGACAACACACTCCA  |
| VM39  | TACTGCTGCCGAAGTGATTG  | AAGTGCTTCACCGGCATAAC  |
| VM42  | TCCAGATTGAATCCGACCTC  | GCTATGCTAAGGCTCGGTTG  |
| VM43  | GGAACTCACTGAGGAGCAG   | GACGCAAATTTGGATTGAT   |
| VM44  | ATCAGATTGCAGCACATGGA  | CGACGGAGTGGAGGTAGGTA  |
| VM46  | CACGGCCCCGACTACAACAT  | GCTCGTGCACGTCAACTAAA  |
| VM211 | TCACATGTCCAAAACCGAGA  | CGACAGTGTGTTGTGTGCTG  |
| VM212 | GAAGGCTTGCTTTTCAACCA  | TTAGTCGGCGCTTTGCTAAT  |
| VM213 | ACTTGTGCCGAACTCCAGAC  | TTGGTTTTGCATGGTAGACG  |
| VM216 | AGCTGTGCGACTCCTCCAAAA | CGATAGCACAGGCCATATCA  |
| VM221 | GTCCCATCGATCGAAAAGC   | CGGCATGGAAAACGGTAGTAA |
| VM224 | TCCTCTCCAAATCCCACATC  | CCCCAACCAAAAAGTCTAACG |
| VM226 | CTCGGTTGCCTTCTTCTCAC  | TTTTGCAACAGAACGTCAGG  |
| VM310 | CACGAGATTGGAAGGGAAGA  | ACGGTTGTAGTCGGATCGTC  |
| VM311 | GATGCCAACGCTCATCTGTA  | CTGACCTCCTTGTGGACGAT  |
| VM312 | AATCAGCTCCGCAACCATAG  | CCCAAACCTAACCCTAACC   |
| VM313 | GGTAGTCAACAGGGTGCAG   | TTGATCTCTCATGCGTTTGC  |
| VM314 | CGGTTGAGGAGGAGAGAGAA  | GAGTACGTCCCCAATGAGA   |
| VM316 | GTGGAGATGAAATGGCCTTG  | TGCAGGTATTGACGGTCTGA  |
| VM317 | CCTCTGGGATTGGGAAAAAT  | TTTGACGAGCACATCTCAGG  |
| VM318 | TCTTGCAAGCATTGGTCATC  | AAATCGAGAGAGAGGGATCG  |
| VM319 | CGTCTAACCCCACTTGCTTC  | TTCTGGGCGTGACAGTGTAG  |
| VM320 | AAGATTCATCACCACGCACA  | GGAGTCCACCTCTCCTCCTT  |
| VM321 | AAGCCCACTAATTTGCGGTG  | TAGGGCACTGCTCTGTTGTG  |
| VM322 | CTGAAACCGGTGTCCTCAAC  | TAGGAAGAGGCTCCGTCAA   |
| VM323 | CAAGCCTCCTCTCATCCTCA  | GTATTTATGCGCCATTGCTG  |
| VM324 | AAGCCGAGCCAATGTTTTAG  | ATATCAAGCCAGCGAGCAAG  |
| VM328 | CCACAAGAAGTGGGTGAGGT  | CGACACCTCACACTCGGTAA  |
| VM329 | GGAGGGTTAGGAATGGGAGA  | GGTTAACCCCACTTGCTTCC  |
| VM330 | CAGGAGAAGGTTGCTTTTGC  | ACTTGAGTCCGGCATGTCTT  |
| VM331 | GCTGAGGTCATTGCTCCTTC  | CCATTTTTACCTTGGGTTG   |
| VM332 | CGGATGGTGCAGGAATAAAA  | TTTCAACCATGGCAACGTAA  |
| VM333 | CGGGCAAACCTAATCACTA   | AGGTTTCGGCATGGTTGATA  |
| VM334 | AATGCGCCATTAGTTCAACC  | GGTCGAAACACTGTCTTGCTC |
| VM335 | ACCCGGATGCAAGATTACAG  | CTAGCCATATTGTGCCGTTG  |
| VM410 | CCTTCTGGGGGTTTCTCTC   | CAAGTTCGGCAAACCTGTCAA |

**Supplemental Table 4.2** ChIP-PCR primers for validation of H3K4me2 modified regions

| Name | Primer L              | Primer R             |
|------|-----------------------|----------------------|
| VDM1 | CCAGGAAGTCGAGCTTGTGT  | CATCATCACCACCACCAC   |
| VDM2 | GGTGCCGTAGATCGAGGATA  | CCAACCTATGCACCATCACA |
| VDM3 | CTCTTTAACGGCGCTACCTG  | AAAACAAACGGTGGATTGC  |
| VDM4 | GGAACCTGGTTCATGTTGTTG | CCTCCCCACAAGATCGTAGA |

|       |                       |                      |
|-------|-----------------------|----------------------|
| VDM5  | ACATATGGGTCCGTCTCAGG  | TCTCCGCTCTCCCTTGTCTA |
| VDM6  | GGCTCAGCCAAACCAAAATA  | GGCTCTTGACGTGACATC   |
| VDM7  | TGTGTGCTGCGATAGGTAGC  | TTGTACTGCTCGGGGAAGAT |
| VDM8  | CTGCAGGAAATTCAGAAGCA  | CTTGGTTGTGCTGAGGATGA |
| VDM9  | CATTTTTCCCATCGCTTTTG  | AAACGGAGAAGCGAAGAACA |
| VDM10 | ATGATGCAGAGCAAGTGCAG  | AAGACGGATAGGGGAGAGGA |
| VDM11 | GTCGCCATGGGGAGTAGTAA  | CGTCGTTTTCTTGGTTTGGT |
| VDM12 | GGAGCGGAAGTAATTGTCCA  | GCGTGTGGAATGAAGCTTTT |
| VDM13 | GTTTGTCCCCCACAACATC   | CTCGCTGAAATGTTGCAGAA |
| VDM14 | TGCCAGCCAATAGTGAACAA  | GCTCACCCATGGAGAGGTAA |
| VDM15 | TTCTCATGTGGTTAGGAGCTT | ACCATGGCGAATTCTTTGTC |
| VDM16 | AAGCGCATAACACAAGCAC   | TGCCAGGAGGTGAGAGTACA |
| VDM17 | TTGTCCTTGACCTCCTCCAC  | GCTTTCATGGCGTACGTTTT |
| VDM18 | AGAGAAGCCCAGTGAATTTT  | GGCATAAGAAACGAGGTCA  |
| VDM19 | CAAACAAGGCAACAGCTTCA  | GCGCAAAGTTCTCGGTATTC |
| VDM20 | CTCAAGCCCATCTCCTCAAC  | TTTTGACCCTGGTTTTGTCC |
| VDM21 | GGTTCCCTGGTTACAAACG   | TCATCAACCTTTTGCAGGTG |
| VDM22 | AGCTTAGGAGCACCACCAGA  | ATAGCCAGCATTTTGCTTCG |
| VDM23 | ATTGTGTGCCACCATCAAGA  | GGCTTCAGAAGGACCATGAG |
| VDM24 | GAAGAGCAGCTTGATTTGGTG | GGCTGTGTGGGAGTAGGAGA |
| VDM25 | CCTCGAGCATGCAATCAAAT  | GAATGCAGGACACTGCGATA |

**Supplemental Table 4.3** ChIP-PCR primers for validation of H3K4me3 modified regions

| Name  | Primer L              | Primer R               |
|-------|-----------------------|------------------------|
| VTM1  | GTCGTGCAGGAGGCAGTC    | TTTAGAGCGCACCCCTCAGTT  |
| VTM2  | TGATGGCAACCAAGAAGTCA  | CACATCGAGAGGTGCTCGTA   |
| VTM3  | GCAATCCACCGTTTGTTTTT  | GGCCAAAATCTGGCAACTTA   |
| VTM4  | GATGGTGTGAGGAGGAGGA   | ACCCCTACCCTGACACTTCC   |
| VTM5  | CGAGAGCCTATGGGCTACAA  | AAAACGCAAGCACTTGATGA   |
| VTM6  | GCAAACCGAACAGGCATTAT  | GCTTTGATTGTGGGGAGCTA   |
| VTM7  | TCTGGGCCTGCAGTTAATTC  | TGGCGACTATCTTCCCCATA   |
| VTM8  | CAACTGCCACTTGATTAC    | CTTGGTTGTGCTGAGGATGA   |
| VTM9  | ATCCCAACCTGCAATTTTTG  | TCTCCTGCTTAGTGCCACCT   |
| VTM11 | TCCACCCACAAGAGAGAAG   | ACTCGTCGAGGTGAATCTGG   |
| VTM12 | CATCGAGAAAAATGCCACT   | CTTTGGTGCTGTGCAAATGT   |
| VTM13 | AACCCATTACCTGTTACG    | CTGACCATACGGGCTCTTCT   |
| VTM14 | GACTCCATGGGGAGTAGCAA  | TCCCGGTCGTCAAAGAATTA   |
| VTM15 | TGGCGATTTGTGTTCTTCTG  | CATGCTCCCGCATATCTTTT   |
| VTM16 | TTCCACAATCCGTCTCATCA  | AGTGAATTGCCGGTGCTATC   |
| VTM17 | GCTAGATTGGGAGGACACCA  | CAACACGGACTCCAAAACATT  |
| VTM18 | TGGTACCTCCTCCTGTACC   | CCAACCGCAATGGAGACTAT   |
| VTM19 | AAATGCAAACCTGCCATACC  | TGAATTCAAGCGCTCCTTTT   |
| VTM20 | GCAGCCATGCCAAGTATTTT  | TGCTATACGCAATGCTGGAG   |
| VTM21 | TTTTCCAGATCCTGTTTGACC | GCATGATAAAAATTGCATACGG |
| VTM22 | GCTTTTGATCGGCATCTCTC  | AAGGTGGCTGGAAACATTTG   |
| VTM23 | TGTACAGCCATCCATGCACT  | GTGGAGAGGTCAAGGACAA    |
| VTM24 | CTGCTGCTAGCTTTCGGTCT  | ATCGCATCGATCAAGCTACC   |
| VTM25 | AACGAGGTCTCTCAGCGGTA  | CGGAGATAGGGAAGGGGATA   |

**Supplemental Table 4.4** PCR primers for bisulfite genomic sequencing validation of DNA methylated regions

| Name | Primer L             | Primer R                 | LOC ID     |
|------|----------------------|--------------------------|------------|
| A    | TTAAGTGGATTGGTTGAATT | CTAATAAAAACCTAAAATTACACC | Os10g24100 |

|     |                          |                       |            |
|-----|--------------------------|-----------------------|------------|
| B   | TGATTAGTTTGGTTGTGTTAAGT  | AAATTACTTCCTATATCCCT  | Os04g29580 |
| C   | TAGTAGAGAAGGTTTTTAAG     | AATACTAAAAAACACCCTCCT | Os04g16980 |
| D   | GATGTTGATTTAAGAAAGTA     | CAAACAAAAAACRAAAAAACC | Os10g39930 |
| E/F | TATGGTGTATTTTGTTTYGTGAAG | CTATCACATCTTTTTCTTATT | Os10g22130 |
| G   | GGATTTGTATTTGAGTATTAAG   | CCTTCTTTCAACATTAATAAA | Os04g53630 |
| H/I | GAGTAATTTATGTGATTATAAGG  | RCCAATTATACTTAACCCAA  | Os04g07670 |

**Supplemental Table 4.5** ChIP-PCR primers for validation of differential H3K4me3 modification between two tissues

| Name   | Primer L              | Primer R              |
|--------|-----------------------|-----------------------|
| ACT1G1 | CGTCTGCGATAATGGAAC TG | CACACGGAGCTCGTTGTAGA  |
| ACT1M  | GCCGTCCTCTCTCTGTATGC  | GCAATGCCAGGGAACATAGT  |
| SCT1   | AGCAATCGAGCTTCTTCAGC  | CAGAAGCCATGGTTTTGTGA  |
| SCT2   | CCCATCAAGGTAGGCATCTC  | CATTGCGTTACACTGGAGGA  |
| SCT3   | TAGGAGGGACCTGAACGTGA  | CAACCACAGCCTGCAAATTA  |
| SCT4   | GCCAAACAGAGTGCACATGA  | TTGATCGCTAGCTGTTGCAT  |
| SCT5   | TTTCTTCCCCACCTCATCTG  | CGGTCTCGCTCCTAATTCAT  |
| SCT6   | TGACTACTGCCATTGGCTTG  | GTTGTGACGCTCAATCAGA   |
| SCT7   | AACTGTCCGCTTCCCATGT   | TGGATCATAGAACGCACCAG  |
| SCT8   | CCTGTGCTTGATCCATCGTA  | GCAATCCTTTTTGCCACATT  |
| SCT9   | AAAAAGGAAGCCTCGTAGCC  | GATGGTTCCTTAGCCCTGCAA |
| SCT10  | TGATGAGCAGGGATTGTTGT  | CACAGCACCAACGTTACCAA  |
| SCT11  | TCTTGTCTTTGGGGAAATCG  | TGCTGGAGTTGAAGCTGATG  |
| SCT12  | CTAGGGGGAAAAGGCAAAAAG | GGGAATTCTGTGTGCTGGTT  |
| SCT13  | ATCTACGGACCGTGTCTGG   | AACAGCATTGCAGCACACAT  |
| SCT14  | TCTGCGGCTGGTCTAGAGAT  | GTTTCATCAAGCTTGGCTTCC |
| SCT15  | CAAAGTTATGGGACGTGGAA  | TCCGTGACAAGGATGACAAA  |
| SCT16  | AAGCCATAACCCAACAACCA  | AATCTTGTGTTTCGGGATGC  |
| SCT17  | GACAATGTCAGGGGCTTGTT  | TCAAAATGCCAGGCTAATCA  |
| SCT18  | TTTGCAACAAAGCATGTGGT  | CAACCCATCAAGAAGTCAA   |
| SCT19  | TTTTTCCGTCGAGTCCATC   | CAGTAGCAGCCTCCCTTGAA  |
| SCT20  | CTGGACCAGACACGTTCAGA  | TGGCAAAAGCTCACAATCAG  |
| CST1   | TCAGCGAATATCCCACCTTCC | TTTATCTTCCTCTGCGGTTGA |
| CST2   | GACCAGAGCAATGAGGAAGG  | AGATGGATGCGTCTCTCGTT  |
| CST3   | AGATTGCTGCTCCTGTTGGT  | AAAAGAATGCAGGGGGAAC T |
| CST4   | GGCAACAAGGCCATTTTAAG  | TGAGAGGCAGGTAAGATGGTG |
| CST5   | ACTCGGACTGTTGTGTGCTG  | CACTCATTGTGAGGCCAGA   |
| CST6   | GGACGCCAAGGTCACTACTC  | GCCGCTTTCTCCTCCTTATC  |
| CST7   | AGCACGGTGATACCATGACA  | TTTGTTTGTGCTGTGCGATT  |
| CST8   | GCAATGGCGGCATATAAGTT  | CAAGGAAGGACCTTGAACCA  |
| CST9   | GGAAGGATCTCCAAATGCAA  | CATCTCTTCGCGCCTTTTAC  |
| CST11  | TGTTCAACGTCTTGGACTGC  | GCAAACATGCATGAGCAGAT  |
| CST12  | TCAACTGGGACACGGATTTT  | ACGGTGGCACCATTTTTAAC  |
| CST13  | GATGAGGCGAGGAGTGAAAG  | TCCTGAACAACCGAATCACA  |
| CST14  | CTTTGGCACCCAATGATGTA  | CTCTGCAATTTTCCAGCACA  |
| CST15  | TGATTTGATGGCTTTTGCAG  | CCAAGTCCCAAAGCATTGT   |
| CST16  | GCTCTTCCTGCAGTTGTCGT  | GAGGAGGAGGAAGACGTGTG  |
| CST17  | CACCGATCTGATTGCCCTAC  | AGGTGCTCCTGTTGAGTGCT  |
| CST18  | CCTTCAGCAAATTCATCTGGA | CCACACCTGTGGACTGTGAC  |
| CST19  | CCCCTGTGGGAGGATTA CT  | AATTATCCGAGCCGACCTT   |
| CST20  | GGCCACTTGGTTTGAATTGT  | AGTAGGGGTGGGTCTGCTTT  |
| CST21  | ATCGCGGAGAATGAGAAGAA  | CTTGCAAGAATTGGGTCGAT  |
| CST22  | TAACACGTATCCGGGGTTGT  | AGCAACAGCCAAAGCAGACT  |

|       |                       |                       |
|-------|-----------------------|-----------------------|
| CST23 | CAACATCCTCCCCATTGAAC  | TCTTTTGGCCCAGTTTTCAC  |
| CST24 | CCATGATGAATCCACCGAGT  | CAACAGCCAGCCAAGGTAAT  |
| CST25 | AAGAGAGTGGAAGGGGAGGA  | GAGATGGGGTTTCAGGTTCA  |
| CST26 | GTGTGCATTTGGTGTTTTGC  | TGCCTCCAAATTTGTTCCAT  |
| CST27 | TCCAGGAGTTCTGGGTGTTC  | TGACACTGCAGAGAGGGTTG  |
| CST28 | CCTCATCATCAACACCCACA  | GAGGTTAGATGGGGTGAGCA  |
| CST29 | GGAATTCAAAAAGAGGCACCA | CTCCCCACCTCAGGACATAA  |
| CST30 | CCTCCTCATGAAGGTTGGAC  | TTGGGGGAATGCCATAGATA  |
| CST31 | ATTTGGGGGAGAGCTCTGAT  | GCTCCTCTAAGTGCTCCTGGT |
| CST32 | AAATCAAGGGGTTGCTGTTG  | GAATTCCTCCATCCTTCCTGT |
| CST33 | GCAGTTCACGCTCATGAAT   | ATCTATAGGGCCACGAAGCA  |
| CST34 | GCAGGAAACAAGCAAATTCC  | GGTTTGGCTTTTGACCTTGA  |
| CST35 | GTTGGATCCGATGGAATTTG  | GGGAACAACCAATGCAACAT  |
| CST36 | CGTTGAATCCACCTGTTTCT  | CTGTTGCGACTGCCATTCTA  |
| CST37 | GTCACCCTCACCCAAACAAT  | CCAGGACTTGGTTGCATTTT  |
| CST38 | CAATCAACTGGTTTCGCACA  | GTGGGAGACATCAAGGAGGA  |
| CST39 | AAGAAACGGAAGGGGAAAAA  | GCACCCTAGAATTCCCATGA  |

**Supplemental Table 4.6** ChIP-PCR primers for validation of differential H3K4me2 modification between two tissues

| Name   | Primer L                  | Primer R              |
|--------|---------------------------|-----------------------|
| ACT1G2 | GCCGTCCTCTCTGTATGC        | ACAGTGTGGCTGACACCATC  |
| ACT1G3 | GACGGAGCGTGGTACTCAT       | GCAATGCCAGGGAACATAGT  |
| SCD1   | ATGGTCACAACCTGCAGGTCA     | AATTCAGGGTGGTTTGTCTG  |
| SCD2   | TCAGGAATAATCGTACTTCTGTCTG | TTCAATCCGAAAACGGTAT   |
| SCD4   | TACAGTGCCTGCTGCTGTCT      | TTCACCTGCACAAACACACA  |
| SCD5   | ATTGCTTCCCAGCAAGAAGA      | CCTCAGTTCTCAACGCACAA  |
| SCD6   | CATTTTTGGCCCTTCTACA       | AGGCGTTTCTCTTCCCTCTC  |
| SCD7   | GGAAGGATCTCCAAATGCAA      | CATCTCTTCGCGCCTTTTAC  |
| SCD10  | CTTTGGGTGTTCCCTTACGA      | AGATTGAGGCCAGTGCAGAT  |
| SCD12  | GGGTGGTTCTTGAAAGGTCA      | AGCAACAGCTGGAGTCCAAT  |
| SCD13  | GCGAAAGCAATAACTGCACA      | TGAACTTCAGCAGCAAGCAT  |
| SCD15  | TTGCTACAGGCGATTTTCT       | ATCCTGGAAAAGGCTCCAAT  |
| SCD17  | TGAACTCGTTGGCATCAAAG      | GGTATGCCGAAGGATGATGT  |
| SCD19  | GGCAGGTTTGCCTTGTATGT      | ACCAAACCAACCAAATCGAG  |
| SCD20  | CACTTTTCTCTTGGCCTTCG      | CAGAGCATGAACTGCCACAT  |
| SCD26  | CCACATGCATCTCAAAGTGC      | GGAACGAACGGTTGATGAAT  |
| SCD28  | GAAAGCTGGCCAATTTTGT       | CCCGGTGGAAAAAGAAACTC  |
| SCD29  | TCAACCAAACATTTCAAACCA     | CGCACTGAATCTGTGATGAA  |
| SCD30  | TTCCGGAAGAGAGTTTCTGG      | GGCCTGACTTGCCAAAATAA  |
| SCD31  | TGGGAAGAGGTTCTCAACA       | CAAGGCACATCATCCACTTG  |
| SCD32  | CCTGTGTGTCACCACTCACC      | AGAGGCCAAGAACCAACAAA  |
| SCD33  | CCTGTGCTCTTCTCCTTG        | AGAAGTACGGCCTCACGATG  |
| SCD34  | TCAGATCGAAATCGCAAATG      | CCATGTAGTCGGTGGTGATG  |
| SCD36  | TGCCCTTCGAGTTTCTCATT      | TTCGTGCAGTGATACCTTGC  |
| SCD37  | AGAATGCCCTCTCAGTCTGC      | GTTAGCGCGTTGTGGTAGT   |
| SCD40  | AGTGGCTGCTCCATCTCTGT      | GCATGTGAGGCAAACCTCAGA |
| SCD41  | ACGAATTCTAACCCGTCGTG      | TGCACAAAAATTCGAATCCA  |
| SCD42  | AACATTTCCAGCACCCAGAG      | GTGCTTTGGTATCGGAGCTT  |
| SCD43  | ATCTCTGCGTCGAATCACCT      | CAAGCAACGATGAATCAGGA  |
| SCD46  | CCCAGTTGCTGTGTCTCGTA      | GTGAACGGACTTTGACACGA  |
| SCD48  | CTTGCCTGCTTATCATCTG       | ATTTCTCTTGGCCGTCCATT  |
| SCD51  | ATTGCTTTGGGCTTTGCTTA      | TATCCCCAACAGAATGAGC   |

|       |                       |                       |
|-------|-----------------------|-----------------------|
| SCD52 | CTTGCTCCAATGCGGTTTAT  | GAACCTTGCCACAGGAGCAT  |
| SCD53 | CAGTACCAAATGCCCAAACC  | CTCAAAGCAAGGCTGGAGT   |
| SCD54 | AACTGAGATGGCAGGTTTGG  | TCTTCAGGTGCCAAGAAGGT  |
| SCD59 | ACAGGATCCTCTCGTTGAGC  | AGTTCCGGTAGGGGAAAAGA  |
| SCD61 | TAAGGGGTAAACAGGGCAATG | GTGAGCGAGAACGCATGATA  |
| SCD63 | TGGCTTTGCGCTTCTATTTT  | AGAAGGTTCCGCTCTCCATT  |
| SCD65 | TTAACCCCAATCAGCATTG   | GTTTAGGGTTGGGGTTGGTT  |
| SCD66 | CCAACAACCCCAAGTAAA    | TCGTTCTTGGTGCTTTGATG  |
| SCD67 | CCCCTAGGCCCTTGTGTAAT  | AAGACTGCCCTAGCGAATTG  |
| SCD68 | TTGCTGGCACTCAAGAAAGA  | AAGCCTGCTTCCAACCTACA  |
| SCD69 | GCTGCATCGTGGATTACTGA  | TCCCGGAACATCCATAAAAG  |
| SCD73 | TCTGGATGTTACCCGCATTA  | CAACCTTGACCGCTTAGCC   |
| SCD74 | CATCAGCCGCCATAAGCTAC  | ATCAACGCGGCAGCTAGTAT  |
| CSD1  | TCCTCCAGTGTAACGCAATG  | CGCTCTCAAAGATTGTCTG   |
| CSD3  | TGGGGTCTGAAGAATCACAG  | TTGCTCATCAAGCCTTCCTT  |
| CSD4  | GCAAGCATCTGACGAAATGA  | GCTCGTTCAACGCATATCAA  |
| CSD5  | GACCATTATTGGCCGTTGAC  | TCATGGACCACATGAGAAAAA |
| CSD6  | TGGCTGCTTCTTGTTTTCA   | CCCCTGAACCTGGAAGAT    |

**Supplemental Table 4.7** McrBC-PCR primers for validation of differential DNA methylation between two tissues

| Name   | Primer L              | Primer R              |
|--------|-----------------------|-----------------------|
| CCDE1  | CAAAAGAGGGGTCTTCCACA  | GCATGATGGAAGCAGCTACA  |
| CCDE2  | GCGCATGCTTCTATCTAGGG  | CATGCAAAAACCGCTATCCT  |
| CCDE3  | AATGTGCCACACAACCAGAA  | TGGACCAGTGTGCTTGCTAC  |
| CCDE4  | ATTAAGGATGCCATGCGAAG  | CTCGACAGTTCAACCAAGCA  |
| CCDE6  | GGCAATCCCTTGAACACACT  | CGGCTTTATTGTCCACGATT  |
| CCDE7  | GCCCTGTTTCAAAGCACAT   | CGCTCTCAAACCCTGCTTAC  |
| CCDE9  | CGCACATATACACCCAACCTT | CCGTGCTCAGCTTGACAATA  |
| CCDE12 | GATGATGGAGGAGCACGACT  | GGTAAGGCCATTACAGTGC   |
| CCDE14 | TGCATAGGGCCATTAAGGAG  | CAAGGTTCTCCCACCACTGT  |
| CCDE15 | AATCAGCGTTCGAGGAGCTA  | TAAGCCCTTCGCACAACCTCT |
| CCDE16 | GGCAAGTGTTCGACCGTTAT  | GGGAATCAAGACTCGTCCAA  |
| CCDE17 | TCCACTTCGGCGTTATTACC  | CCTACAGGCAGGACTCAAGC  |
| CCDE19 | TGGTTGCCTGTGTGTTCAAT  | GATGGACATGCTTCCAGGTT  |
| CCDE22 | GATCAAACATTGCGGTTGTG  | ACCTCGCATTGACCAGGTAG  |
| CCDE23 | GCTAGCATCCGTGCCTTTAG  | TGGTGTCTGTGCCAAATTA   |
| CCDE26 | GCAATTTTTCGGTGTCCTGT  | GGAGCAAAGAACGACTCCAG  |
| CCDE27 | GAGTTCACTGCTCCCTCTGC  | GGGATGAAGAAATCCCGAAT  |
| CCDE29 | GGCATCGGAAAGAGGGTATT  | TCAGTTCCTGCAGGGTTAGG  |
| CCDE30 | TTCAGCAGGCTATCCGTCTT  | TTGGGAAAGCGAAGTAGTGG  |
| CCDE32 | TAGATGGGGTTATGCGAAGG  | TCGACTCAACATGCTTTTGG  |
| CCDE33 | CGTTGTCAAGACCAAGCAGA  | GGCTTCAATCCACTTGGA    |
| CCDE34 | TTGATTGCTCAACGCAGAC   | CGTATGGTCCACAGCATCAC  |
| Tos17  | GTACCCGTTCTTGACTAT    | CTGAAATCGGAGCACTGACA  |
| ACT1   | GCCGTCCTCTCTGTATGC    | GGCAAGCAACATTGTAAGCA  |
| VM42   | TCCAGATTGAATCCGACCTC  | GCTATGCTAAGGCTCGGTTG  |
| VM410  | CCTTCTGGGGGTTTCTCTC   | CAAGTTCGGCAAACCTGTCAA |

**Supplemental Table 4.8** RT-PCR primers for validation of differentially expressed genes between two tissues

| Name   | Primer L             | Primer R             |
|--------|----------------------|----------------------|
| ACT1G1 | CGTCTGCGATAATGGAACTG | CACACGGAGCTCGTTGTAGA |
| ACT1M  | GCCGTCCTCTCTGTATGC   | GCAATGCCAGGGAACATAGT |



|        |                       |                        |
|--------|-----------------------|------------------------|
| SCT1   | GCTATCCTGTCTTCGCAGGT  | TCACTTGCTTGCTCACAACC   |
| SCT2   | AGCACGTTCTACGGCGAGT   | GAACGAGATCGTCCTCATCG   |
| SCT3   | GCCACCACCACAAAATAAGG  | CAGGAACAGCCCAAGGTG     |
| SCT4   | GTGTCCGCCAAGAAGTCGT   | GACGAAGATCCCCAGCAC     |
| SCT5   | GTGACATCCCCACCTACGTC  | GTTGAGCTTCCCCTTGAGGT   |
| SCT6   | GCGATTCCGTAGAAGGGATT  | GTCATGGCATCATTTCAGTGC  |
| SCT7   | AGCCAAGGAAGCATCAGAAA  | TTGCATCCTCTATGCTGTCTG  |
| SCT8   | TCTGTAGGGGGTGAAAATGG  | CCTGTGCTTGATCCATCGTA   |
| SCT9   | GGTGGATTTGGTTCTGATGG  | GCTCTTCCTCCTGGGAAAAC   |
| SCT10  | TGCACATACCCGTCCTGTAA  | AGAATTTCTTTCCGCCAGT    |
| SCT11  | CAACTCGATCCAGCCAGATT  | GGTTGCTCATTGTTGATTTTGA |
| SCT12  | GTCCACAAGGAAGCTGAGGA  | TTGCCTGTCAAGCATCAAAC   |
| SCT13  | AGAGGAAATCGGCAATGATG  | CGTCTGGTCCACTTGGTTTT   |
| SCT14  | CCATGAACGAACCATTAGCA  | GCGATGAAGACGAGGTCATT   |
| SCT15  | AGTCTGGACCGCATACAACC  | GGGTATCCAACCGACTTGTT   |
| SCT16  | CGAAGCAGAAGCAATCATCA  | AAAGGAATAGGGCCTGCAAT   |
| SCT17  | ACATCACCAAGGGCTACGTC  | CCTCCATCGATCTTTCTTGG   |
| SCT18  | GGGTGGATGATCAAGGTGAA  | CAGACCACTGGCTTGAAGTG   |
| SCT19  | ACCAGCAGATTGACGACACC  | GGGCAATAATGGCGGAAG     |
| SCT20  | GTATCCGGTATCGGTTGTGG  | CGTGATGCTGTCGCTAGTGT   |
| CST1   | ACGTTTCAGTGAGGAGCCTGT | CAGGGCCAAGATATCAGCTC   |
| CST2   | AGGGAATCGAGTGTGTTTCG  | GATGGTCAGCGAGTCCTTG    |
| CST3   | TGGAGGGAAAGCTGAACAGT  | TCCTTGACGACTGCATTAC    |
| CST4   | ATGATTGTTGCTGCCATTTG  | GCCACTGGCTGAGTCAAGAT   |
| CST5   | AATAATCACCCGGTCACCAA  | GCAAGTTACGAGCTGTGCAA   |
| CST6   | AAGGAAACCTTCAGGGGCTA  | GGCTGCAACATTTGGGTAGT   |
| CST7   | AGGAAAGGTTGCCTGGATCT  | TGGTCATCAGTTGGCATCAT   |
| CST8   | GACGAAGCAAAGCCAACTTC  | ACATAGAACCCTGCCAATGC   |
| CST9   | AAATGGCTGAAAGGCTTCCT  | TGCTGGGTGAGCTAGAACCT   |
| CST11  | ATCGGCTTCAACGACTGTCT  | CCAAGGCCCTTACAGATGA    |
| CST12  | GCTACCCGTTCTTGGACTAT  | CTGAAATCGGAGCACTGACA   |
| CST13  | ACAGTTTACATCCGCCTTCG  | CCCCTTCAGTTCAAGCAAAA   |
| CST14  | AACAATGAGGGAATGCTTCG  | CTCTGCAATTTTCCAGCACA   |
| CST15  | TGAGAAAAGCCTGTGAAGCA  | AGCAATGGGAGGATTGTGTC   |
| CST16  | ATATACGCCGTGTCGAGGAA  | TACATCATGCACCCGAGATG   |
| CST17  | TGTATGCACGTTTGCAGTGA  | GCTCGTCAGCTTGAACATCA   |
| CST18  | AAGCCAGTCGAGACAAGGAA  | TGTCAGAGTCGTGCCTGTTC   |
| CST19  | AGCCATCAGCTCCTGAGGTA  | TTGATGCCTAGGGAACCAAG   |
| CST21  | ATTGGCTGAATTGGTTCGTTT | CAACTCGAGCAATGACAGGA   |
| CST22  | ACTGGCGGCCATATTTACAG  | CAAAGGGAGTGGTACCCAGA   |
| CST24  | TTCCCTCCAGCTTTCTTTGA  | TCATCAACCGAGCAATTTCA   |
| CST27  | GGTGTCTTGTGATGCAGAA   | TGAACCACAGGTGCATTGTT   |
| CST30  | TGCAACAGTCTCCTGAAACG  | CCAGCAGCTTGATCAACAAA   |
| CST31  | GAGAGTTGGGCGGAGTTATG  | ATGCCCCATGTAATTGAAA    |
| CST33  | CTTGAAGGCCACCTATTGGA  | CCACTCCCATGTCCTCTTGT   |
| CST34  | CCGAAAAGGGAAGTAAAGC   | ACCAAGCAGTTTCTCCCTCA   |
| CST36  | ACCTGTTCTCCTGTGTTGG   | AGGAAGGTGAGCTCCTGTCA   |
| CST39  | CTGGCTTGGACTGAAGAAGG  | TCTAATGCCGAAGGCAGTTT   |
| ACT1G2 | GCCGTCCTCTCTGTATGC    | ACAGTGTGGCTGACACCATC   |
| ACT1G3 | GACGGAGCGTGGTTACTCAT  | GCAATGCCAGGGAACATAGT   |
| SCD1   | ACGTTTCAGTGAGGAGCCTGT | CAGGGCCAAGATATCAGCTC   |
| SCD2   | ATGATTGTTGCTGCCATTTG  | GCCACTGGCTGAGTCAAGAT   |

|        |                       |                       |
|--------|-----------------------|-----------------------|
| SCD4   | AAGGAAACCTTCAGGGGCTA  | GGCTGCAACATTTGGGTAGT  |
| SCD5   | AGGAAAGGTTGCCTGGATCT  | TGGTCATCAGTTGGCATCAT  |
| SCD6   | GACGAAGCAAAGCCAACCTC  | ACATAGAACCCTGCCAATGC  |
| SCD7   | AAATGGCTGAAAGGCTTCCT  | TGCTGGGTGAGCTAGAACCT  |
| SCD10  | TTCTATCATTGCGCTGATGC  | CTGCTTGGCTCTTTTCAAGC  |
| SCD12  | GCAAGTGAAGGAAGCACACA  | TTCAACTGTGCCGTTTCAAG  |
| SCD13  | CCCTAGGTGCCAAGAAGAAA  | CTGCAGCATCCAACATTAGC  |
| SCD15  | TTTCAAGCCAATCACTGCTG  | CAGACCAGGGAATAAACCAAA |
| SCD17  | CTGGTATGCCGAAGGATGAT  | TGAATTCATGAGTGCCTTGC  |
| SCD19  | GGGCTTTCACACTCTCAAGC  | AACCCAAACGACTCGATGAC  |
| SCD20  | CAGAGCATGAACTGCCACAT  | GGACTGGTGTCTCTGCCATT  |
| SCD26  | GATGACGATGAGGAGGAGGA  | ACACTAATCCAACGGCAAGG  |
| SCD28  | GCCGTGGTTTGAACATTTCT  | GCAACATCTTCCAGCGGTAT  |
| SCD29  | GTGAACCAGCCCTACGTCAT  | ATTCAAGAGCGCACTGAGGT  |
| SCD30  | TGTGTTCCAGTTGAGCGAAG  | GCACCAGGCTCTGAATTAGC  |
| SCD31  | CAGGACAAAGCGACTGTCA   | CACTGAAAGGTGCAGCGATA  |
| SCD32  | CATCACTGGATGAGCGAAAA  | GCATGTCCGGTACAAAGTGA  |
| SCD33  | CGCTCGTCTCTACAAGGTC   | TCAACCCAGGATTTCAAAGG  |
| SCD34  | TGCAACTCAGAAGACCGTTG  | TGGAGTAGCTCGAAAAGGT   |
| SCD36  | GTGAACCGAACACTCGGAAT  | GCAGTGCATACTTGCCCAA   |
| SCD37  | TGACAAGAAATGCCCATTC   | ATGGGCGCAGAACTTCTTA   |
| SCD40  | ATGTTTGCGCAGAAGAAGGT  | TTAGGTTACCGTGCCAGGAC  |
| SCD41  | ACCTTCCACAGAAACCGTTG  | ACCTGGCTGGAGAACAGAGA  |
| SCD42  | TGGTGACATTGTGCATGTTG  | AAAGCACCAGTTACCCATGC  |
| SCD43  | CCCGATTTGAGTTGTTGCTT  | TGCACAACATGGTTCCTGAT  |
| SCD46  | CAGTTCGGGATTTCTTTGGA  | ATCGTCGGGGAGTAGTCCTT  |
| SCD48  | GAGTGGGACATCCTCTCCAA  | CCGAATTTGCGGAAAACTA   |
| SCD51  | GGCTCTGGTGTGTTGAAAT   | ACGTGAACCGTGAATCTTCC  |
| SCD52  | AAGGCCGATCACTACACCAC  | GGGATTGACAAGGCAACACT  |
| SCD53  | GTCTTGTGTTGGTGACCGTCT | TCAAATCCAGGGTCAAAGC   |
| SCD54  | GACCTGAGCGTGTGAGCATA  | AGCGATGGCAGATCTCAACT  |
| SCD59  | TCCAATCCAAGGAGGATGAG  | CACAGCTGGAGGGTAAAGGA  |
| SCD61  | CGACCAATTCTGGTTCAGGT  | TCCTGCACCTCCTTCTCAGT  |
| SCD63  | ATATGACGTGCAAGCAGCAG  | GGTTCCTATTCGATGGAGCA  |
| SCD65  | AGTAATCAGCTGGCGCCTAA  | CCCTCAGAAGCCTTCAACTG  |
| SCD66  | GCTTCCCAGCAAAGTTCAAG  | CCTTTACGCAGTTGCTCTCC  |
| SCD67  | CCAAATGGTATGCCTTGCTT  | GCTCAGTAAACAGCCGAGACC |
| SCD68  | CTAAGGGACGCAATGTGGTT  | GTAATCCATTCCACCCATGC  |
| SCD69  | TGGTACGACATCCAGTCCAA  | AAATTGCCTCGGACAACAAC  |
| SCD73  | GGGAGAGGACACATCTTGGA  | TCACATCAACAGACCGCAAT  |
| SCD74  | AGCGTCTAATGCGATTTGCT  | GGGCCATCACCATGAATAAC  |
| CSD1   | AGCACGTTCTACGGCGAGT   | GAACGAGATCGTCTCATCG   |
| CSD3   | GTATCCGGTATCGGTTGTGG  | CGTGATGCTGTCGCTAGTGT  |
| CSD4   | TGCAAGCTTGTGGCTTACAC  | TTTCAGGCTTTTTCGCTTGT  |
| CSD5   | TGAACTGGAGAGGGAGCAGT  | AGGGTGTGTCGGAGTTACG   |
| CSD6   | TCCTTTTGAACCGTACGAC   | GTGCAGTTGCAAGATGAGGA  |
| CCDE3  | GCCGTGGGAGTATCTCATGT  | GCACCCATAGAGGTGAAAGC  |
| CCDE4  | GTGGACAAGCTGAATGCAAA  | TTGGGATGGTTTGTCTTGT   |
| CCDE6  | CCCGAGTATTGCTGGAACAT  | TCAAACACAAGGGCATCGTA  |
| CCDE9  | CTGTGATGTCCATGGTGAGG  | CCAGGAGTTCTTCAGCAACC  |
| CCDE16 | CTTTATGGCGATGAGGCAAT  | GAACCTCTCGCCTTTGAGTG  |
| CCDE17 | GTCGGTGACGATGCCTTATT  | TCCACTTCGGCGTTATTACC  |

|        |                      |                      |
|--------|----------------------|----------------------|
| CCDE19 | ACGCAAGGAGGAAGAACAGA | TCCAGTTCGGCGTTATTACC |
| CCDE30 | CTAGATGGCTTCGCTTCTGC | CAACAAAACGAGCGAACTGA |
| CCDE33 | GCCCCTTCAGATGTGTTTGT | TGCCTTTGTGAATGTCTTGC |
| Tos17  | GCTACCCGTTCTTGGACTAT | CTGAAATCGGAGCACTGACA |

---

## **SUPPLEMENTAL METHODS**

### **Isolation of Methylated DNA Using the McrBC Digestion Method**

Total genomic DNA was extracted from light-grown shoots and suspension-cultured cells using the Plant DNeasy Mini Kit (QIAGEN). Methylated DNA was isolated using an McrBC digestion method adapted from previous report (Lippman et al., 2004). McrBC is a DNA methylation-specific restriction enzyme that cleaves between two [A/G] C sites separated by 40-3000 bp, only when the C residue in each [A/G] C motif is methylated (New England Biolabs). Due to the high frequency of [A/G] C sites in the genome, methylated regions will be cleaved into small fragments. 20 µg of genomic DNA were digested overnight with 200 units McrBC (New England Biolabs), then separated on a 1.0% agarose gel. DNA fragments smaller than 500 bp, which presumably contain mainly methylated DNA, were recovered using QIAquick Gel Extraction Kits (QIAGEN) (Supplemental Figure 1). About 2.0 µg recovered methylated DNA or sonicated total genomic DNA (< 500 bp) were labeled with Cy3 or Cy5 using the BioPrime Array CGH Genomic Labeling System (Invitrogen) and used for microarray hybridization. Two replicates of each tissue were analyzed.

### **Chromatin Immunoprecipitation (ChIP)**

Chromatin from light-grown shoots and cultured cells was immunoprecipitated with antibodies against H3K4me2 (Upstate), H3K4me3 (Abcam) or CenH3 (Nagaki et al., 2004) as described previously (Gendrel et al., 2005). ChIP (enriched) and input (whole cell extract) DNA samples were amplified using a random amplification procedure as described (Lippman et al., 2005). 2.0 µg amplified ChIP or Input DNA was labeled with Cy3 or Cy5 using the BioPrime Array CGH Genomic Labeling System (Invitrogen) and used for microarray hybridization. Three replicates of each tissue were analyzed. Conventional ChIP-PCR was performed on DNA samples from input, mock (no antibody) and ChIP using the primer pairs listed in Supplemental Table 4.

### **Tiling-path microarray design**

Chromosome 4 and 10 sequences used to design the tiling-path microarray were based on the rice *japonica* genome assembly release 2.0 by TIGR. Probes were selected using the NASA Oligonucleotide Probe Selection Algorithm (NOPSA) that takes probe sequence complexity, nucleotide composition, secondary structure and other factors into account (Stolc et al., 2005). To reduce the potential of cross hybridization from highly repetitive sequences, we measured the frequency in the genome of each of the 20 consecutive 17 nt sequences within each 36 nt probe, calculated the average frequency for each probe, and probes (except those in the two centromeres) with average frequencies greater than five were removed (Stolc et al., 2005). This procedure led to a resolution of 36 bp per probe plus a median gap of 82 bp between probes. The NimbleGen Maskless Array Synthesizer system was used to synthesize 380,766 oligonucleotides *in situ* on a single chip that covers 77.5% of rice chromosomes 4 (~35 Mb) and 10 (~23 Mb). The estimated coverage was calculated as follows:

$$\frac{(36bp + 82bp) \times 380766}{35244269bp + 22876596bp} = 77.5\%$$

This tiling array platform can be found in the NCBI Gene Expression Omnibus (GEO) database with the accession number GSE9925.

### **Microarray Hybridization**

Microarray slides were incubated in prehybridization buffer (5X SSC, 0.1% SDS, 1% BSA) for 30 min – 1 hour at 42° C and washed with water. Slides were then hybridized with Cy3- or Cy5-labeled DNA targets in hybridization buffer (5X SSC, 0.1% SDS, 0.5 mg/ml salmon sperm DNA, 0.5 mg/ml BSA) for 16-20 hours at 50° C. After hybridization, slides were washed sequentially with 2X SSC / 0.1% SDS, 0.2X SSC / 0.1% SDS and 0.2X SSC for 10 min each at room temperature. The dried slides were scanned with a GenePix 4200A scanner (Axon), and independent TIFF images for both Cy3 and Cy5 channels were acquired at 5µm resolution.

### **Microarray data processing and analysis**

#### *Normalization of microarray raw data*

Microarray raw data was first processed by the LOWESS normalization module in the LIMMA R package (Smyth et al., 2005) to balance the hybridization intensities for biases between Cy3 and Cy5 fluorescence. In the second step, the Quantile normalization module in the NMPP package (Wang et al., 2006) was used to remove the experimental variances across all the replicate arrays and samples.

#### Identification of modified genomic regions

Identification of genomic regions enriched for methylated DNA or modified histones was based on the One-sided Wilcoxon Signed Rank Test (Hollander and Wolfe, 1999). We performed the test on paired data points (ChIP/Input) within a sliding window of  $\pm 500$  bp across each interrogated oligonucleotide probe, on average containing 8 to 12 probes, to determine whether hybridization intensities of the methylated or ChIP-enriched DNA samples were significantly greater than those of the total genomic DNA input samples. The algorithm of the Wilcoxon Signed Rank Test is described in Affymetrix's Statistical Algorithms Description Document (2002 Affymetrix, Inc.). A "methylated DNA" or "modified histone" region was defined by combining adjacent probes with a significance threshold of  $p < 0.05$ , allowing a maximal gap of 150 bases, and requiring a minimal run of two consecutive probes

#### **Mapping and functional analysis of DNA methylation, H3K4me3 and H3K4me2**

##### Re-mapping probes to rice genome release 4.0

Since the tiling array was designed using rice genome release 2.0 and the genome was updated to release 4.0 in January, 2006 (<http://www.tigr.org/tdb/e2k1/osa1/>), we remapped all probes to the new version using BLAT (Kent, 2002). 388,082 of the 388,546 probes for chromosomes 4 and 10 and centromeres 4 and 8, were mapped on version 4.0 with 100% identity, and 96.5% match a unique genomic position.

##### Mapping modified regions to annotated genes

All sequences of genes, transposable elements, and other genomic elements studied in our analyses were obtained from TIGR rice genome release 4.0. This version annotated 6,347 protein-coding genes and 2,432 TEs, respectively, on chromosomes 4 and 10. Some of

the most repetitive transposons and a few protein-coding genes were not covered on the tiling array because we were unable to design sufficiently selective probes. After removing the uncovered gene models (a covered gene model requires a minimum density of 2 probes per Kb), 6,329 (99.7%) protein-coding genes and 2,248 (92.4%) TEs were covered in our analysis.

In rice genome release 4.0 about 60% of protein-coding genes are supported by full-length cDNA or EST evidence, and the rest are computer-predicted. Therefore, the annotated gene start may refer to either the putative transcription initiation site or the start of gene annotation. For genes supported by full-length cDNAs annotated gene starts usually refer to transcription start sites. However, for predicted genes, annotated gene starts may refer to the translation start site (ATG). Therefore, for all analyses regarding the distribution of specific modifications within genes, we calibrated gene alignments using a reference set of full-length cDNAs. We defined a gene to be carrying a particular modification if we detected an overlap of at least 150 bp between a gene and a particular modified region. We also defined the region 1.0 kb 5' to the gene start site as the promoter region.

#### *Analysis of gene epigenetic modifications and gene expression*

We used two rice gene expression datasets to characterize the relationships between epigenetic modifications and transcriptional activity. To analyze the effects of epigenetic modifications on gene expression in light-grown shoots we used the microarray data (Affymetrix rice microarray) provided by the NSF Rice Oligonucleotide Array Project public resource (<http://www.ricearray.org>). We also repeated the analysis using our own shoot expression data (Jiao and Deng, 2007) and obtained the same results (data not shown). To analyze differences between light-grown shoots and suspension-cultured cells in epigenetic modification and gene expression we used a recently-published rice expression microarray dataset from our lab (Jiao and Deng, 2007).

#### *Multivariate linear regression analysis*

In order to compare the extent to which genes were modified, we defined a modification density per kb for each gene, calculated by the formula:

$$Density = \frac{\text{number of signal probes}}{\text{gene length}} \times 1 \text{ kb}$$

Multivariate linear regression analysis was performed on modification density and  $\log_{10}$  transformed expression intensity with the built-in "LINEST" function in Microsoft Excel, then the "TREND" function was used to return the predicted Y values linearly distributed along the best-fitting line for each modification as a separate factor.

Expression data for light-grown shoots were obtained from the NSF Rice Oligonucleotide Array Project public resource (<http://www.ricearray.org>).

### **Mapping H3K4me3, H3K4me2 and DNA methylation regions in relation to other genomic elements**

To characterize the DNA methylation, H3K4me3 and H3K4me2 regions located between gene territories, we mapped these regions against other genomic elements found on rice chromosomes 4 and 10 including the sequences encoding tRNA, microRNA, snoRNA, siRNA, intergenic EST, intergenic Transcriptionally Active Regions (TARs) and two kinds of insertion sequences (T-DNA & Tos17). EST sequences were downloaded from the NCBI rice Unigene collection and mapped to rice genome release 4.0. ESTs located between the territories of annotated genes or transposable elements were designated "intergenic". Intergenic TARs were identified in a previous high-resolution rice whole-genome tiling microarray project as actively transcribed elements that did not correspond to annotated genes (Li et al., 2007). 139 rice tRNA genes were obtained from the TIGR rice genome 4.0 annotation, 68 rice snoRNA sequences were collected from the NONCODE ncRNA database (Liu et al., 2005), 44 rice microRNA sequences were collected from miRBASE (<http://microrna.sanger.ac.uk/>) and 75 rice endogenous siRNA were collected from the supplemental data of Sunkar *et al*, 2005a and Sunkar *et al*, 2005b. The positions of 2442 Tos17 retrotransposons were determined from TIGR rice genome build 4.0 and 3490 T-DNA insertion sites were obtained from the supplemental data of Jeong *et al*, 2006.



Since the non-coding elements are too short to be detected by our analysis but may be processed from much longer transcripts we extended our analyses of epigenetic modifications 500 bp to either side of the chromosomal coordinates of tRNA, snoRNA, microRNA and siRNA sequences. Conversely, we used the unaltered chromosomal coordinates of intergenic TARs, ESTs and Tos17 and T-DNA insertion sites to map their epigenetic modifications. As with genes, we defined an element to be carrying a particular modification if we detected an overlap of at least 150 bp between the element and a particular modified region.

## **SUPPLEMENTAL REFERENCES**

- Gendrel, A.-V., Lippman, Z., Martienssen, R., and Colot, V.** (2005). Profiling histone modification patterns in plants using genomic tiling microarrays. *Nat Meth* **2**, 213-218.
- Hollander, M., and Wolfe, D.A.** (1999). *Nonparametric Statistical Methods*. (New York: John Wiley and Sons, Inc.).
- Jiao, Y., and Deng, X.W.** (2007). A genome-wide transcriptional activity survey of rice transposable element-related genes. *Genome Biol.* **8**, R28.
- Kent, W.J.** (2002). BLAT---The BLAST-Like Alignment Tool. *Genome Res.* **12**, 656-664.
- Li, L., Wang, X., Sasidharan, R., Stolc, V., Deng, W., He, H., Korbil, J., Chen, X., Tongprasit, W., Ronald, P., Chen, R., Gerstein, M., and Deng, X.W.** (2007). Global Identification and Characterization of Transcriptionally Active Regions in the Rice Genome. *PLoS ONE* **2**, e294.
- Lippman, Z., Gendrel, A.-V., Colot, V., and Martienssen, R.** (2005). Profiling DNA methylation patterns using genomic tiling microarrays. *Nat Meth* **2**, 219-224.
- Lippman, Z., Gendrel, A.-V., Black, M., Vaughn, M.W., Dedhia, N., Richard McCombie, W., Lavine, K., Mittal, V., May, B., Kasschau, K.D., Carrington, J.C., Doerge, R.W., Colot, V., and Martienssen, R.** (2004). Role of transposable elements in heterochromatin and epigenetic control. *Nature* **430**, 471-476.
- Liu, C., Bai, B., Skogerbo, G., Cai, L., Deng, W., Zhang, Y., Bu, D., Zhao, Y., and Chen, R.** (2005). NONCODE: an integrated knowledge database of non-coding RNAs. *Nucl. Acids Res.* **33**, D112-115.
- Miyao, A., Tanaka, K., Murata, K., Sawaki, H., Takeda, S., Abe, K., Shinozuka, Y., Onosato, K., and Hirochika, H.** (2003). Target Site Specificity of the Tos17 Retrotransposon Shows a Preference for Insertion within Genes and against Insertion in Retrotransposon-Rich Regions of the Genome. *Plant Cell* **15**, 1771-1780.

- Nagaki, K., Cheng, Z., Ouyang, S., Talbert, P.B., Kim, M., Jones, K.M., Henikoff, S., Buell, C.R., and Jiang, J.** (2004). Sequencing of a rice centromere uncovers active genes. *Nat. Genet.* **36**, 138-145.
- Smyth, G.K., Michaud, J., and Scott, H.S.** (2005). Use of within-array replicate spots for assessing differential expression in microarray experiments. *Bioinformatics* **21**, 2067-2075.
- Stolc, V., Li, L., Wang, X., Li, X., Su, N., Tongprasit, W., Han, B., Xue, Y., Li, J., Snyder, M., Gerstein, M., Wang, J., and Deng, X.W.** (2005). A Pilot Study of Transcription Unit Analysis in Rice Using Oligonucleotide Tiling-path Microarray. *Plant Molecular Biology* **59**, 137-149.
- Wang, X., He, H., Li, L., Chen, R., Deng, X.W., and Li, S.** (2006). NMPP: a user-customized NimbleGen microarray data processing pipeline. *Bioinformatics* **22**, 2955-2957.
